# Supplementary material for: Distinct Neurogenomic States in Basal Ganglia Subregions Relate Differently to Singing Behavior in Songbirds
Source: PLoS Comput Biol. 2012 Nov 8;8(11):e1002773. doi: 10.1371/journal.pcbi.1002773 (PMC3493463; doi:10.1371/journal.pcbi.1002773)
Supplement: Table S2 — Functional annotation results for VSP-specific modules. Functional annotation results for the VSP modules least preserved in area X (blue, green-yellow, salmon, and yellow). Each row represents an enriched term, columns represent the module the term was enriched in (Module), the database/category the term is from (Category), the term itself (Term), whether the term was enriched only in the module indicated in the first column (uniqueToMod), the number of module genes annotated by the term (Count), the enrichment p-value (PValue) and false discovery rate (FDR) computed by DAVID, the average module membership of genes annotated by the term (avg.kME), the term significance score as computed by the average kME multiplied by 1 – the enrichment p-value (kME*(1-pval)), and the genes annotated by the term (geneSym). (XLS) [file pcbi.1002773.s006.xls]

## Sheet: Sheet1
Module	Category	Term	uniqueToMod	Count	PValue	FDR	avg.kME	kME*(1-pval)	geneSym
greenyellow	GOTERM_CC_FAT	GO:0043209~myelin sheath	TRUE	4	0.00069189	0.869281	0.829206	0.828632	ERMN,MAG,MBP,PLP1
blue	GOTERM_BP_FAT	GO:0007193~inhibition of adenylate cyclase activity by G-protein signaling	TRUE	8	0.00219622	3.79213	0.770729	0.769037	ADCY2,CHRM5,FLNA,NPY2R,OPRD1,OPRL1,OPRM1,S1PR1
blue	GOTERM_MF_FAT	GO:0004629~phospholipase C activity	TRUE	7	0.000713117	1.09257	0.760044	0.759502	CHRM3,CHRM5,F2RL2,PHLDB2,PLCB4,PLCL1,PLCXD3
yellow	GOTERM_BP_FAT	GO:0008542~visual learning	TRUE	5	0.00793097	12.7104	0.760385	0.754354	ATXN1,CACNA1C,DRD2,DRD5,GRIN1
blue	SMART	SM00630:Sema	TRUE	8	0.000513476	0.651659	0.748942	0.748557	PLXNA1,PLXNA4,PLXNC1,SEMA3A,SEMA3C,SEMA4B,SEMA5A,SEMA6D
blue	UP_SEQ_FEATURE	domain:Sema	TRUE	8	0.000564355	0.963447	0.748942	0.748519	PLXNA1,PLXNA4,PLXNC1,SEMA3A,SEMA3C,SEMA4B,SEMA5A,SEMA6D
blue	INTERPRO	IPR001627:Semaphorin/CD100 antigen	TRUE	8	0.00063284	1.00905	0.748942	0.748468	PLXNA1,PLXNA4,PLXNC1,SEMA3A,SEMA3C,SEMA4B,SEMA5A,SEMA6D
blue	GOTERM_MF_FAT	GO:0004435~phosphoinositide phospholipase C activity	TRUE	5	0.00738201	10.7834	0.742686	0.737204	CHRM3,CHRM5,F2RL2,PLCB4,PLCL1
blue	GOTERM_BP_FAT	GO:0031280~negative regulation of cyclase activity	TRUE	10	0.000869996	1.51875	0.736645	0.736005	ADCY2,ADRA2A,CHRM5,FLNA,GABBR2,NPY2R,OPRD1,OPRL1,OPRM1,S1PR1
blue	GOTERM_BP_FAT	GO:0007194~negative regulation of adenylate cyclase activity	TRUE	10	0.000869996	1.51875	0.736645	0.736005	ADCY2,ADRA2A,CHRM5,FLNA,GABBR2,NPY2R,OPRD1,OPRL1,OPRM1,S1PR1
blue	GOTERM_BP_FAT	GO:0051350~negative regulation of lyase activity	TRUE	10	0.000869996	1.51875	0.736645	0.736005	ADCY2,ADRA2A,CHRM5,FLNA,GABBR2,NPY2R,OPRD1,OPRL1,OPRM1,S1PR1
blue	SMART	SM00423:PSI	TRUE	9	0.000977926	1.23773	0.736261	0.735541	PLXNA1,PLXNA4,PLXNC1,PTTG1IP,SEMA3A,SEMA3C,SEMA4B,SEMA5A,SEMA6D
blue	INTERPRO	IPR003659:Plexin/semaphorin/integrin	TRUE	9	0.00122715	1.94797	0.736261	0.735358	PLXNA1,PLXNA4,PLXNC1,PTTG1IP,SEMA3A,SEMA3C,SEMA4B,SEMA5A,SEMA6D
yellow	GOTERM_MF_FAT	GO:0005388~calcium-transporting ATPase activity	TRUE	5	9.26187446447477e-05	0.133809	0.729912	0.729844	ATP2A2,ATP2B1,ATP2B2,ATP2B3,ATP2C1
yellow	GOTERM_MF_FAT	GO:0015085~calcium ion transmembrane transporter activity	TRUE	5	0.000503052	0.724772	0.729912	0.729545	ATP2A2,ATP2B1,ATP2B2,ATP2B3,ATP2C1
yellow	PIR_SUPERFAMILY	PIRSF001297:Na(+)/K(+)-transporting ATPase alpha chain	TRUE	5	0.000510106	0.632694	0.729912	0.72954	ATP2A2,ATP2B1,ATP2B2,ATP2B3,ATP2C1
yellow	INTERPRO	IPR006068:ATPase, P-type cation-transporter, C-terminal	TRUE	5	0.000556327	0.84338	0.729912	0.729506	ATP2A2,ATP2B1,ATP2B2,ATP2B3,ATP2C1
yellow	INTERPRO	IPR004014:ATPase, P-type cation-transporter, N-terminal	TRUE	5	0.000556327	0.84338	0.729912	0.729506	ATP2A2,ATP2B1,ATP2B2,ATP2B3,ATP2C1
yellow	GOTERM_BP_FAT	GO:0001975~response to amphetamine	TRUE	6	0.000164121	0.279821	0.727366	0.727247	DRD2,DRD5,GNAL,GRIN1,PPP3CA,SLC18A2
yellow	INTERPRO	IPR006408:ATPase, P-type, calcium-transporting, PMCA-type	TRUE	3	0.0102708	14.5405	0.732748	0.725222	ATP2B1,ATP2B2,ATP2B3
yellow	GOTERM_BP_FAT	GO:0007611~learning or memory	FALSE	10	0.00890782	14.1662	0.73053	0.724023	ATXN1,CACNA1C,DRD2,DRD5,EGR1,EGR2,GRIN1,PLCB1,PTEN,RPS6KB1
yellow	INTERPRO	IPR003091:Voltage-dependent potassium channel	TRUE	5	0.00915188	13.0582	0.729342	0.722667	KCNA1,KCNA4,KCND2,KCND3,KCNQ3
yellow	GOTERM_BP_FAT	GO:0006816~calcium ion transport	TRUE	13	0.000249482	0.425068	0.722839	0.722659	ATP2A2,ATP2B1,ATP2B2,ATP2B3,ATP2C1,CACNA1C,CACNG3,CAMK2B,DRD2,GRIN1,JPH4,PPP3CA,SLC24A4
yellow	GOTERM_BP_FAT	GO:0015674~di-, tri-valent inorganic cation transport	TRUE	13	0.00124313	2.10122	0.722839	0.72194	ATP2A2,ATP2B1,ATP2B2,ATP2B3,ATP2C1,CACNA1C,CACNG3,CAMK2B,DRD2,GRIN1,JPH4,PPP3CA,SLC24A4
yellow	GOTERM_MF_FAT	GO:0015271~outward rectifier potassium channel activity	TRUE	4	0.00219498	3.1267	0.720944	0.719362	KCND2,KCND3,KCNIP2,KCNK2
yellow	KEGG_PATHWAY	hsa04020:Calcium signaling pathway	TRUE	14	0.000423645	0.479965	0.718071	0.717767	ATP2A2,ATP2B1,ATP2B2,ATP2B3,CACNA1C,CAMK2B,DRD5,GNAL,GRIN1,GRIN2D,GRM5,PLCB1,PPP3CA,PPP3R1
yellow	UP_SEQ_FEATURE	short sequence motif:Selectivity filter	TRUE	8	0.000212918	0.346451	0.717651	0.717498	KCNA1,KCNA4,KCND2,KCND3,KCNJ11,KCNJ2,KCNJ4,KCNQ3
yellow	GOTERM_BP_FAT	GO:0050801~ion homeostasis	FALSE	20	0.00162339	2.73562	0.717259	0.716094	ABCB7,ATP2A2,ATP2B2,ATP2C1,ATP5B,ATXN1,CACNA1C,DRD2,DRD5,EGR2,GRIN1,JPH4,KCND2,KCNJ11,MON1A,POU3F1,PPARD,PPP3CA,SCN8A,SLC9A5
blue	GOTERM_BP_FAT	GO:0030814~regulation of cAMP metabolic process	TRUE	12	0.00617558	10.3201	0.71931	0.714867	ADCY2,ADRA2A,CALCR,CHRM5,FLNA,GABBR2,NPY2R,OPRD1,OPRL1,OPRM1,S1PR1,TIMP2
salmon	SP_PIR_KEYWORDS	kinase	FALSE	11	0.0113724	13.2296	0.722634	0.714416	CAMKK1,CDK6,CDK7,CDKL5,DGKI,LRRK1,LTK,MAPK14,MATK,PLK2,TNIK
yellow	GOTERM_BP_FAT	GO:0006873~cellular ion homeostasis	TRUE	19	0.00198211	3.33053	0.713866	0.712451	ABCB7,ATP2A2,ATP2B2,ATP2C1,ATP5B,ATXN1,CACNA1C,DRD2,DRD5,EGR2,GRIN1,JPH4,KCND2,KCNJ11,MON1A,POU3F1,PPARD,PPP3CA,SCN8A
yellow	GOTERM_MF_FAT	GO:0005250~A-type (transient outward) potassium channel activity	TRUE	3	0.00502168	7.01927	0.715901	0.712306	KCND2,KCND3,KCNIP2
yellow	GOTERM_BP_FAT	GO:0055082~cellular chemical homeostasis	TRUE	19	0.00244812	4.09825	0.713866	0.712118	ABCB7,ATP2A2,ATP2B2,ATP2C1,ATP5B,ATXN1,CACNA1C,DRD2,DRD5,EGR2,GRIN1,JPH4,KCND2,KCNJ11,MON1A,POU3F1,PPARD,PPP3CA,SCN8A
salmon	INTERPRO	IPR017441:Protein kinase, ATP binding site	FALSE	10	0.00103138	1.30779	0.711947	0.711212	CAMKK1,CDK6,CDK7,CDKL5,LRRK1,LTK,MAPK14,MATK,PLK2,TNIK
blue	GOTERM_BP_FAT	GO:0045761~regulation of adenylate cyclase activity	TRUE	11	0.00785497	12.9477	0.716824	0.711193	ADCY2,ADRA2A,CALCR,CHRM5,FLNA,GABBR2,NPY2R,OPRD1,OPRL1,OPRM1,S1PR1
salmon	INTERPRO	IPR000719:Protein kinase, core	FALSE	10	0.00137956	1.74572	0.711947	0.710965	CAMKK1,CDK6,CDK7,CDKL5,LRRK1,LTK,MAPK14,MATK,PLK2,TNIK
salmon	UP_SEQ_FEATURE	domain:Protein kinase	FALSE	10	0.00164992	2.29751	0.711947	0.710772	CAMKK1,CDK6,CDK7,CDKL5,LRRK1,LTK,MAPK14,MATK,PLK2,TNIK
blue	GOTERM_BP_FAT	GO:0031279~regulation of cyclase activity	TRUE	11	0.00884704	14.4656	0.716824	0.710482	ADCY2,ADRA2A,CALCR,CHRM5,FLNA,GABBR2,NPY2R,OPRD1,OPRL1,OPRM1,S1PR1
salmon	INTERPRO	IPR008271:Serine/threonine protein kinase, active site	FALSE	8	0.0042918	5.33908	0.713218	0.710157	CAMKK1,CDK6,CDK7,CDKL5,LRRK1,MAPK14,PLK2,TNIK
salmon	INTERPRO	IPR017442:Serine/threonine protein kinase-related	FALSE	8	0.00450411	5.59625	0.713218	0.710006	CAMKK1,CDK6,CDK7,CDKL5,LRRK1,MAPK14,PLK2,TNIK
yellow	GOTERM_CC_FAT	GO:0034702~ion channel complex	TRUE	14	0.000394444	0.525009	0.708185	0.707906	ANO3,CACNA1C,CACNG3,KCNA1,KCNA4,KCND2,KCND3,KCNIP2,KCNJ11,KCNJ4,KCNK1,KCNK2,KCNQ3,SCN8A
salmon	SP_PIR_KEYWORDS	serine/threonine-protein kinase	FALSE	8	0.00835695	9.88823	0.713218	0.707258	CAMKK1,CDK6,CDK7,CDKL5,LRRK1,MAPK14,PLK2,TNIK
yellow	GOTERM_MF_FAT	GO:0005516~calmodulin binding	TRUE	13	0.000390021	0.56235	0.706064	0.705789	ATP2B1,ATP2B2,ATP2B3,CACNA1C,CAMK1D,CAMK2B,CAMKK2,GRIN1,PPP3CA,PPP3R1,RGS4,SNTA1,SPTBN1
salmon	GOTERM_MF_FAT	GO:0004672~protein kinase activity	FALSE	10	0.00873763	10.775	0.711947	0.705726	CAMKK1,CDK6,CDK7,CDKL5,LRRK1,LTK,MAPK14,MATK,PLK2,TNIK
salmon	GOTERM_BP_FAT	GO:0006468~protein amino acid phosphorylation	FALSE	10	0.00992473	14.4067	0.711947	0.704881	CAMKK1,CDK6,CDK7,CDKL5,LRRK1,LTK,MAPK14,MATK,PLK2,TNIK
yellow	GOTERM_CC_FAT	GO:0034703~cation channel complex	TRUE	12	0.000240794	0.320803	0.704318	0.704148	CACNA1C,CACNG3,KCNA1,KCNA4,KCND2,KCND3,KCNIP2,KCNJ4,KCNK1,KCNK2,KCNQ3,SCN8A
greenyellow	SP_PIR_KEYWORDS	lipoprotein	FALSE	13	0.00336633	4.25907	0.705977	0.703601	ADORA2B,APOD,ARL1,CA4,CNTN6,LPAR1,MAG,MARCKSL1,PLP1,RAB10,RAB11B,RAB39,RHOU
blue	INTERPRO	IPR000956:Stathmin	TRUE	4	0.00140298	2.22413	0.702505	0.701519	STMN1,STMN2,STMN3,STMN4
blue	PIR_SUPERFAMILY	PIRSF002285:Op18/stathmin	TRUE	4	0.00186758	2.53363	0.702505	0.701193	STMN1,STMN2,STMN3,STMN4
blue	PIR_SUPERFAMILY	PIRSF002285:Stathmin	TRUE	4	0.00186758	2.53363	0.702505	0.701193	STMN1,STMN2,STMN3,STMN4
blue	SP_PIR_KEYWORDS	transducer	FALSE	25	0.000897097	1.28555	0.701424	0.700795	ADRA2A,CALCR,CCRL2,CHRM3,CHRM5,F2RL2,GABBR2,GNG10,GNG2,GNG4,GPR123,GPR153,GPR162,HRH1,MRGPRX2,NPY2R,NPY5R,OPRD1,OPRL1,OPRM1,PHLDB2,PLCB4,PLCL1,PLCXD3,S1PR1
greenyellow	SP_PIR_KEYWORDS	cell membrane	FALSE	24	0.00152453	1.95002	0.700839	0.69977	ADORA2B,AIF1,AIF1L,ATP2B4,CA4,CAPNS1,CDH19,CNTN6,GDPD2,GLRA4,GPR61,GPRC5B,GRIK1,HSD17B7,LGR5,LPAR1,MBP,P2RY12,RAB10,RAB11B,RAB39,RHOU,TMEM25,TTYH2
yellow	INTERPRO	IPR001757:ATPase, P-type, K/Mg/Cd/Cu/Zn/Na/Ca/Na/H-transporter	TRUE	6	0.00197979	2.97117	0.700803	0.699416	ATP11C,ATP2A2,ATP2B1,ATP2B2,ATP2B3,ATP2C1
yellow	INTERPRO	IPR008250:ATPase, P-type, ATPase-associated region	TRUE	6	0.00197979	2.97117	0.700803	0.699416	ATP11C,ATP2A2,ATP2B1,ATP2B2,ATP2B3,ATP2C1
yellow	INTERPRO	IPR018303:ATPase, P-type phosphorylation site	TRUE	6	0.00197979	2.97117	0.700803	0.699416	ATP11C,ATP2A2,ATP2B1,ATP2B2,ATP2B3,ATP2C1
blue	GOTERM_MF_FAT	GO:0016298~lipase activity	FALSE	11	0.00795231	11.5695	0.704983	0.699377	ABHD12,ASPG,CHRM3,CHRM5,F2RL2,PHLDB2,PLA2G12A,PLCB4,PLCL1,PLCXD3,PLD6
salmon	UP_SEQ_FEATURE	binding site:ATP	FALSE	11	0.00153763	2.14271	0.700093	0.699016	CAMKK1,CDK6,CDK7,CDKL5,EHD3,LRRK1,LTK,MAPK14,MATK,PLK2,TNIK
yellow	UP_SEQ_FEATURE	active site:4-aspartylphosphate intermediate	TRUE	6	0.00300172	4.7815	0.700803	0.698699	ATP11C,ATP2A2,ATP2B1,ATP2B2,ATP2B3,ATP2C1
salmon	INTERPRO	IPR002290:Serine/threonine protein kinase	FALSE	7	0.00406537	5.06409	0.698718	0.695877	CAMKK1,CDK6,CDK7,CDKL5,MAPK14,PLK2,TNIK
greenyellow	SP_PIR_KEYWORDS	actin-binding	TRUE	8	0.00696344	8.6247	0.699258	0.694388	AIF1,AIF1L,ANLN,ERMN,GSN,MYH11,PHACTR2,TMOD2
salmon	SP_PIR_KEYWORDS	phosphotransferase	TRUE	6	0.00829493	9.81829	0.699661	0.693857	CDK6,CDK7,LTK,MAPK14,MATK,PIK3R1
blue	GOTERM_MF_FAT	GO:0004620~phospholipase activity	TRUE	10	0.005277	7.8249	0.697229	0.69355	ASPG,CHRM3,CHRM5,F2RL2,PHLDB2,PLA2G12A,PLCB4,PLCL1,PLCXD3,PLD6
yellow	GOTERM_CC_FAT	GO:0008076~voltage-gated potassium channel complex	TRUE	9	0.000734245	0.975243	0.693864	0.693354	KCNA1,KCNA4,KCND2,KCND3,KCNIP2,KCNJ4,KCNK1,KCNK2,KCNQ3
yellow	GOTERM_CC_FAT	GO:0034705~potassium channel complex	TRUE	9	0.000734245	0.975243	0.693864	0.693354	KCNA1,KCNA4,KCND2,KCND3,KCNIP2,KCNJ4,KCNK1,KCNK2,KCNQ3
salmon	SMART	SM00220:S_TKc	FALSE	7	0.00923399	8.99395	0.698718	0.692266	CAMKK1,CDK6,CDK7,CDKL5,MAPK14,PLK2,TNIK
yellow	GOTERM_BP_FAT	GO:0030001~metal ion transport	FALSE	30	2.10439593545104e-06	0.0035926	0.69214	0.692138	ATP1B3,ATP2A2,ATP2B1,ATP2B2,ATP2B3,ATP2C1,CACNA1C,CACNG3,CAMK2B,DRD2,GRIN1,JPH4,KCNA1,KCNA4,KCNAB1,KCNAB2,KCND2,KCND3,KCNIP2,KCNJ11,KCNJ2,KCNJ4,KCNK1,KCNK2,KCNQ3,PPP3CA,SCN8A,SLC24A4,SLC38A9,SLC9A5
salmon	GOTERM_MF_FAT	GO:0004693~cyclin-dependent protein kinase activity	TRUE	3	0.00716188	8.91476	0.694752	0.689777	CDK6,CDK7,CDKL5
yellow	GOTERM_BP_FAT	GO:0048878~chemical homeostasis	FALSE	22	0.00355396	5.89715	0.692034	0.689574	ABCB7,ALMS1,ATP2A2,ATP2B2,ATP2C1,ATP5B,ATXN1,CACNA1C,DRD2,DRD5,EGR2,GRIN1,JPH4,KCND2,KCNJ11,MON1A,POU3F1,PPARD,PPP3CA,SCN8A,SLC9A5,VEGFA
yellow	SP_PIR_KEYWORDS	potassium channel	TRUE	10	0.000138196	0.188682	0.689501	0.689406	KCNA1,KCNA4,KCND2,KCND3,KCNIP2,KCNJ2,KCNJ4,KCNK1,KCNK2,KCNQ3
yellow	KEGG_PATHWAY	hsa04720:Long-term potentiation	TRUE	11	4.16276326268501e-05	0.0472551	0.688578	0.688549	CACNA1C,CAMK2B,GRIN1,GRIN2D,GRM5,PLCB1,PPP1CC,PPP1R12A,PPP3CA,PPP3R1,RPS6KA6
yellow	SP_PIR_KEYWORDS	calcium transport	TRUE	8	0.00846752	10.9705	0.693406	0.687534	ATP2A2,ATP2B1,ATP2B2,ATP2B3,ATP2C1,CACNA1C,CACNG3,SLC24A4
salmon	GOTERM_BP_FAT	GO:0016310~phosphorylation	FALSE	13	0.00173499	2.67196	0.688606	0.687411	CAMKK1,CDK6,CDK7,CDKL5,LRRK1,LTK,MAPK14,MATK,NDUFB6,PIK3R1,PLK2,TNIK,UQCRC1
salmon	GOTERM_BP_FAT	GO:0007626~locomotory behavior	FALSE	6	0.00898757	13.1343	0.692784	0.686558	CXCL14,HTT,KCNMA1,MAPK14,RAC1,SOD2
blue	INTERPRO	IPR017452:GPCR, rhodopsin-like superfamily	FALSE	15	0.00427084	6.62702	0.689383	0.686439	ADRA2A,CCRL2,CHRM3,CHRM5,F2RL2,GPR153,GPR162,HRH1,MRGPRX2,NPY2R,NPY5R,OPRD1,OPRL1,OPRM1,S1PR1
blue	INTERPRO	IPR000276:7TM GPCR, rhodopsin-like	FALSE	15	0.00473319	7.3192	0.689383	0.68612	ADRA2A,CCRL2,CHRM3,CHRM5,F2RL2,GPR153,GPR162,HRH1,MRGPRX2,NPY2R,NPY5R,OPRD1,OPRL1,OPRM1,S1PR1
yellow	GOTERM_BP_FAT	GO:0019226~transmission of nerve impulse	FALSE	20	0.00327414	5.44499	0.687146	0.684896	ATXN1,BSN,CACNA1C,DRD2,DRD5,EGR2,GRIN1,GRIN2D,GRM5,HOMER1,KCNA1,KCND2,KCNIP2,KCNQ3,POU3F1,PPARD,PPP3CA,PTPRF,SCN8A,SDCBP
greenyellow	GOTERM_MF_FAT	GO:0003779~actin binding	TRUE	9	0.00957999	11.9637	0.691193	0.684572	AIF1,AIF1L,ANLN,ERMN,GSN,MYH11,PHACTR2,SMTN,TMOD2
greenyellow	GOTERM_BP_FAT	GO:0042552~myelination	TRUE	4	0.00486035	7.48733	0.685561	0.682229	MBP,NAB1,PLP1,QKI
salmon	GOTERM_BP_FAT	GO:0006793~phosphorus metabolic process	FALSE	13	0.00936347	13.6468	0.688606	0.682158	CAMKK1,CDK6,CDK7,CDKL5,LRRK1,LTK,MAPK14,MATK,NDUFB6,PIK3R1,PLK2,TNIK,UQCRC1
salmon	GOTERM_BP_FAT	GO:0006796~phosphate metabolic process	FALSE	13	0.00936347	13.6468	0.688606	0.682158	CAMKK1,CDK6,CDK7,CDKL5,LRRK1,LTK,MAPK14,MATK,NDUFB6,PIK3R1,PLK2,TNIK,UQCRC1
yellow	GOTERM_BP_FAT	GO:0006812~cation transport	FALSE	31	2.6434334666591e-05	0.0451196	0.681831	0.681812	ATP1B3,ATP2A2,ATP2B1,ATP2B2,ATP2B3,ATP2C1,ATP5B,CACNA1C,CACNG3,CAMK2B,DRD2,GRIN1,JPH4,KCNA1,KCNA4,KCNAB1,KCNAB2,KCND2,KCND3,KCNIP2,KCNJ11,KCNJ2,KCNJ4,KCNK1,KCNK2,KCNQ3,PPP3CA,SCN8A,SLC24A4,SLC38A9,SLC9A5
greenyellow	GOTERM_BP_FAT	GO:0008366~axon ensheathment	TRUE	4	0.00605768	9.24937	0.685561	0.681408	MBP,NAB1,PLP1,QKI
greenyellow	GOTERM_BP_FAT	GO:0007272~ensheathment of neurons	TRUE	4	0.00605768	9.24937	0.685561	0.681408	MBP,NAB1,PLP1,QKI
yellow	GOTERM_BP_FAT	GO:0019725~cellular homeostasis	TRUE	22	0.00340488	5.65651	0.682067	0.679744	ABCB7,AIFM1,ATP2A2,ATP2B2,ATP2C1,ATP5B,ATXN1,CACNA1C,DRD2,DRD5,EGR2,GLRX5,GRIN1,JPH4,KCND2,KCNJ11,MON1A,PDIA5,POU3F1,PPARD,PPP3CA,SCN8A
yellow	GOTERM_MF_FAT	GO:0046873~metal ion transmembrane transporter activity	TRUE	23	1.86437373731147e-05	0.0269486	0.677103	0.67709	ATP2A2,ATP2B1,ATP2B2,ATP2B3,ATP2C1,CACNA1C,CACNG3,GRIN1,GRIN2D,KCNA1,KCNA4,KCNAB1,KCNAB2,KCND2,KCND3,KCNIP2,KCNJ11,KCNJ2,KCNJ4,KCNK1,KCNK2,KCNQ3,SCN8A
yellow	SP_PIR_KEYWORDS	voltage-gated channel	TRUE	16	2.96804311338065e-06	0.0040558	0.675569	0.675567	CACNA1C,CACNG3,KCNA1,KCNA4,KCNAB1,KCNAB2,KCND2,KCND3,KCNIP2,KCNJ11,KCNJ2,KCNJ4,KCNK1,KCNK2,KCNQ3,SCN8A
yellow	GOTERM_BP_FAT	GO:0006811~ion transport	FALSE	34	0.000449293	0.764278	0.674717	0.674413	ANKH,ANO3,ATP1B3,ATP2A2,ATP2B1,ATP2B2,ATP2B3,ATP2C1,ATP5B,CACNA1C,CACNG3,CAMK2B,DRD2,GRIN1,GRIN2D,JPH4,KCNA1,KCNA4,KCNAB1,KCNAB2,KCND2,KCND3,KCNIP2,KCNJ11,KCNJ2,KCNJ4,KCNK1,KCNK2,KCNQ3,PPP3CA,SCN8A,SLC24A4,SLC38A9,SLC9A5
yellow	GOTERM_MF_FAT	GO:0005509~calcium ion binding	FALSE	37	0.000771038	1.10887	0.674758	0.674237	ANO3,ATP2A2,ATP2B1,ATP2B2,ATP2B3,ATP2C1,ATP5B,B4GALT6,CACNA1C,CACNG3,CALN1,CAMK1D,CAMKK2,DGKB,DLK1,GALNT1,GALNT13,GRIN1,GRIN2D,KCNIP2,LRP8,MAN1A2,MAN1C1,MCTP1,NELL2,PCDH7,PLCB1,PPP3CA,PPP3R1,PRRG1,SLC24A4,SLC25A25,SNTA1,SPOCK1,SYT2,SYT6,TLL1,WBSCR17
greenyellow	SP_PIR_KEYWORDS	glycoprotein	FALSE	37	0.00913596	11.1717	0.678388	0.67219	ADCY8,ADORA2B,APOD,CA4,CALU,CDH19,CHSY3,CNTN6,COLEC12,CRYAB,DKK3,EGFLAM,FIBIN,GDPD2,GDPD4,GLRA4,GPR61,GPRC5B,GRIK1,HEPACAM,HSD17B7,ITGB5,LGR5,LPAR1,MAG,MFAP5,P2RY12,PROCR,PTPLB,QPCT,SCRG1,SLC6A9,TMEM25,TMEM63A,TSPAN10,TTYH2,UGT8
yellow	SP_PIR_KEYWORDS	calcium	FALSE	30	0.009066	11.702	0.677596	0.671452	ANO3,ATP2A2,ATP2B1,ATP2B2,ATP2B3,ATP2C1,B4GALT6,CACNA1C,CACNG3,CALN1,CAMK1D,DGKB,GALNT1,GALNT13,GRIN1,GRIN2D,KCNIP2,LRP8,MAN1A2,MAN1C1,MCTP1,PCDH7,PLCB1,PPP3R1,SLC24A4,SLC25A25,SNTA1,SYT2,SYT6,TLL1,WBSCR17
yellow	GOTERM_BP_FAT	GO:0014075~response to amine stimulus	TRUE	8	7.86804115510272e-05	0.13424	0.669527	0.669474	DRD2,DRD5,GNAL,GRIN1,MSH2,PPP3CA,RPS6KB1,SLC18A2
greenyellow	GOTERM_CC_FAT	GO:0044459~plasma membrane part	FALSE	29	0.0117339	13.8338	0.676831	0.66889	ADORA2B,AIF1,AIF1L,ARL1,ATP1A1,ATP2B4,BCAP31,CA4,EGFLAM,FXYD2,GLRA4,GRIK1,HEPACAM,HMOX1,ITGB5,LGR5,LPAR1,MBP,NINJ2,PROCR,RAB10,RAB11B,RAB39,RHOU,SERP1,SLC6A9,SLC9A3R2,STK39,STX2
greenyellow	GOTERM_CC_FAT	GO:0005886~plasma membrane	FALSE	45	0.000296393	0.37324	0.66827	0.668072	ADCY8,ADORA2B,AIF1,AIF1L,ARL1,ATP1A1,ATP2B4,BCAP31,CA4,CAPNS1,CDH19,CNTN6,CRYAB,EGFLAM,FXYD2,GDPD2,GLRA4,GPR61,GPRC5B,GRIK1,HEPACAM,HMOX1,HSD17B7,ITGB5,LGR5,LPAR1,MAG,MARCKSL1,MBP,NAB1,NINJ2,P2RY12,PROCR,QKI,RAB10,RAB11B,RAB39,RHOU,SERP1,SLC6A9,SLC9A3R2,STK39,STX2,TMEM25,TTYH2
yellow	SP_PIR_KEYWORDS	ionic channel	TRUE	19	0.000443448	0.604278	0.667092	0.666796	ANO3,CACNA1C,CACNG3,GRIN1,GRIN2D,KCNA1,KCNA4,KCNAB1,KCNAB2,KCND2,KCND3,KCNIP2,KCNJ11,KCNJ2,KCNJ4,KCNK1,KCNK2,KCNQ3,SCN8A
greenyellow	UP_SEQ_FEATURE	glycosylation site:N-linked (GlcNAc...)	FALSE	35	0.0101326	13.3298	0.673358	0.666535	ADCY8,ADORA2B,APOD,CALU,CDH19,CHSY3,CNTN6,COLEC12,DKK3,EGFLAM,FIBIN,GDPD2,GDPD4,GLRA4,GPR61,GPRC5B,GRIK1,HEPACAM,HSD17B7,ITGB5,LGR5,LPAR1,MAG,MFAP5,P2RY12,PROCR,PTPLB,QPCT,SCRG1,SLC6A9,TMEM25,TMEM63A,TSPAN10,TTYH2,UGT8
salmon	GOTERM_BP_FAT	GO:0007610~behavior	FALSE	9	0.00254353	3.89419	0.667689	0.665991	CXCL14,HTT,KCNMA1,MAPK14,RAC1,SHC3,SLC24A2,SNAP25,SOD2
yellow	GOTERM_MF_FAT	GO:0019829~cation-transporting ATPase activity	TRUE	6	0.00725866	9.99601	0.670353	0.665487	ATP2A2,ATP2B1,ATP2B2,ATP2B3,ATP2C1,ATP5B
yellow	GOTERM_MF_FAT	GO:0005216~ion channel activity	TRUE	19	0.00314176	4.44707	0.667092	0.664996	ANO3,CACNA1C,CACNG3,GRIN1,GRIN2D,KCNA1,KCNA4,KCNAB1,KCNAB2,KCND2,KCND3,KCNIP2,KCNJ11,KCNJ2,KCNJ4,KCNK1,KCNK2,KCNQ3,SCN8A
salmon	SP_PIR_KEYWORDS	alternative splicing	FALSE	55	0.00590556	7.08517	0.668671	0.664722	ABCC8,ASAP1,BAZ1A,BICD2,CAMKK1,CASP8,CCDC80,CIR1,CSMD1,CSPP1,DACT2,DDX26B,FAM46A,FILIP1L,GULP1,HOPX,INPP4A,JAKMIP3,KCNMA1,KIAA0317,KLHL13,LAPTM4B,LNPEP,LONRF3,LPHN2,LRCH1,LRRK1,LTK,MAP7,MAPK14,MATK,MPHOSPH9,NEDD4L,PDE10A,PDE7A,PHTF1,PIK3R1,PNPLA1,PRMT8,R3HDM1,RAC1,RBMS1,RCAN2,RGS10,SAMD14,SHC3,SLC24A2,SNAP25,SORBS2,SYNE1,TAGAP,TNIK,TRABD,VIP,ZFAND6
blue	SP_PIR_KEYWORDS	neurogenesis	FALSE	19	0.000712834	1.02276	0.664877	0.664403	CAMK1,CHL1,DCLK1,EFNA5,EFNB2,GAP43,HES5,LHX6,NRP2,RBM45,RUFY3,SEMA3A,SEMA4B,SEMA5A,SEMA6D,SERPINE2,SLIT1,SLIT2,STMN1
yellow	GOTERM_MF_FAT	GO:0022838~substrate specific channel activity	TRUE	19	0.00442829	6.21441	0.667092	0.664138	ANO3,CACNA1C,CACNG3,GRIN1,GRIN2D,KCNA1,KCNA4,KCNAB1,KCNAB2,KCND2,KCND3,KCNIP2,KCNJ11,KCNJ2,KCNJ4,KCNK1,KCNK2,KCNQ3,SCN8A
greenyellow	UP_SEQ_FEATURE	topological domain:Extracellular	FALSE	25	0.00366235	5.0234	0.666166	0.663727	ADORA2B,ATP2B4,CDH19,COLEC12,GDPD2,GDPD4,GLRA4,GPR61,GPRC5B,GRIK1,HEPACAM,HSD17B7,ITGB5,LGR5,LPAR1,MAG,NINJ2,P2RY12,PLP1,PROCR,SERP1,SLC6A9,TMEM222,TMEM25,TTYH2
yellow	GOTERM_MF_FAT	GO:0031420~alkali metal ion binding	FALSE	18	1.94826517963705e-05	0.0281611	0.663736	0.663723	ATP1B3,KCNA1,KCNA4,KCNAB1,KCNAB2,KCND2,KCND3,KCNIP2,KCNJ11,KCNJ2,KCNJ4,KCNK1,KCNK2,KCNQ3,SCN8A,SLC24A4,SLC38A9,SLC9A5
yellow	GOTERM_MF_FAT	GO:0015267~channel activity	TRUE	19	0.00581317	8.08283	0.667092	0.663214	ANO3,CACNA1C,CACNG3,GRIN1,GRIN2D,KCNA1,KCNA4,KCNAB1,KCNAB2,KCND2,KCND3,KCNIP2,KCNJ11,KCNJ2,KCNJ4,KCNK1,KCNK2,KCNQ3,SCN8A
yellow	GOTERM_MF_FAT	GO:0022803~passive transmembrane transporter activity	TRUE	19	0.00581317	8.08283	0.667092	0.663214	ANO3,CACNA1C,CACNG3,GRIN1,GRIN2D,KCNA1,KCNA4,KCNAB1,KCNAB2,KCND2,KCND3,KCNIP2,KCNJ11,KCNJ2,KCNJ4,KCNK1,KCNK2,KCNQ3,SCN8A
yellow	GOTERM_MF_FAT	GO:0005261~cation channel activity	TRUE	18	0.000378271	0.545451	0.662434	0.662183	CACNA1C,CACNG3,GRIN1,GRIN2D,KCNA1,KCNA4,KCNAB1,KCNAB2,KCND2,KCND3,KCNIP2,KCNJ11,KCNJ2,KCNJ4,KCNK1,KCNK2,KCNQ3,SCN8A
yellow	GOTERM_MF_FAT	GO:0005249~voltage-gated potassium channel activity	TRUE	13	5.9357337513077e-06	0.00858054	0.661697	0.661693	KCNA1,KCNA4,KCNAB1,KCNAB2,KCND2,KCND3,KCNIP2,KCNJ11,KCNJ2,KCNJ4,KCNK1,KCNK2,KCNQ3
yellow	GOTERM_MF_FAT	GO:0005267~potassium channel activity	TRUE	13	0.000129108	0.18648	0.661697	0.661612	KCNA1,KCNA4,KCNAB1,KCNAB2,KCND2,KCND3,KCNIP2,KCNJ11,KCNJ2,KCNJ4,KCNK1,KCNK2,KCNQ3
yellow	GOTERM_BP_FAT	GO:0050877~neurological system process	FALSE	35	0.00163708	2.75839	0.662387	0.661302	ALMS1,ATP2B2,ATXN1,BSN,CACNA1C,CASP3,DRD2,DRD5,DTNBP1,EGR1,EGR2,GNAL,GRIN1,GRIN2D,GRM5,HOMER1,KCNA1,KCND2,KCNIP2,KCNJ11,KCNQ3,NEFL,OAT,PLCB1,POU3F1,POU3F4,PPARD,PPP3CA,PTEN,PTPRF,RPS6KB1,RS1,SCN8A,SDCBP,TIMM13
yellow	GOTERM_MF_FAT	GO:0022836~gated channel activity	TRUE	18	0.00191299	2.73016	0.662434	0.661166	CACNA1C,CACNG3,GRIN1,GRIN2D,KCNA1,KCNA4,KCNAB1,KCNAB2,KCND2,KCND3,KCNIP2,KCNJ11,KCNJ2,KCNJ4,KCNK1,KCNK2,KCNQ3,SCN8A
yellow	GOTERM_MF_FAT	GO:0005242~inward rectifier potassium channel activity	TRUE	4	0.00914132	12.4323	0.667168	0.661069	KCNJ11,KCNJ2,KCNJ4,KCNK1
yellow	SP_PIR_KEYWORDS	ion transport	FALSE	29	0.000360046	0.490888	0.660439	0.660201	ANO3,ATP1B3,ATP2A2,ATP2B1,ATP2B2,ATP2B3,ATP2C1,ATP5B,CACNA1C,CACNG3,GRIN1,GRIN2D,KCNA1,KCNA4,KCNAB1,KCNAB2,KCND2,KCND3,KCNIP2,KCNJ11,KCNJ2,KCNJ4,KCNK1,KCNK2,KCNQ3,SCN8A,SLC24A4,SLC38A9,SLC9A5
yellow	GOTERM_BP_FAT	GO:0010243~response to organic nitrogen	TRUE	9	0.000481815	0.819386	0.660052	0.659734	DRD2,DRD5,GNAL,GRIN1,MSH2,NEFL,PPP3CA,RPS6KB1,SLC18A2
salmon	UP_SEQ_FEATURE	splice variant	FALSE	54	0.0100487	13.2517	0.666428	0.659731	ABCC8,ASAP1,BAZ1A,BICD2,CAMKK1,CASP8,CCDC80,CIR1,CSMD1,CSPP1,DACT2,DDX26B,FAM46A,FILIP1L,GULP1,HOPX,INPP4A,JAKMIP3,KCNMA1,KIAA0317,KLHL13,LAPTM4B,LNPEP,LONRF3,LPHN2,LRCH1,LRRK1,LTK,MAP7,MAPK14,MPHOSPH9,NEDD4L,PDE10A,PDE7A,PHTF1,PIK3R1,PNPLA1,PRMT8,R3HDM1,RAC1,RBMS1,RCAN2,RGS10,SAMD14,SHC3,SLC24A2,SNAP25,SORBS2,SYNE1,TAGAP,TNIK,TRABD,VIP,ZFAND6
blue	GOTERM_BP_FAT	GO:0006928~cell motion	FALSE	36	0.00120845	2.10368	0.659569	0.658772	ADRA2A,APBB2,ARHGDIA,BMP7,CDH13,CXCL12,DCLK1,DNAH5,EFNA5,ETV4,GAB2,GAP43,GPX1,HMGCR,ISL1,ITGA6,KAL1,KLF7,LAMC1,LHX6,NR2F1,NR2F2,NRP2,NRXN1,NRXN3,NTF3,PLAT,PTPRK,SCG2,SEMA3A,SEMA3C,SEMA5A,SHH,SLIT1,SLIT2,TUBB2C
yellow	GOTERM_MF_FAT	GO:0022843~voltage-gated cation channel activity	TRUE	17	1.10700848280753e-06	0.00160032	0.656089	0.656088	CACNA1C,CACNG3,GRIN2D,KCNA1,KCNA4,KCNAB1,KCNAB2,KCND2,KCND3,KCNIP2,KCNJ11,KCNJ2,KCNJ4,KCNK1,KCNK2,KCNQ3,SCN8A
yellow	GOTERM_MF_FAT	GO:0005244~voltage-gated ion channel activity	TRUE	17	2.93663459894554e-05	0.0424445	0.656089	0.656069	CACNA1C,CACNG3,GRIN2D,KCNA1,KCNA4,KCNAB1,KCNAB2,KCND2,KCND3,KCNIP2,KCNJ11,KCNJ2,KCNJ4,KCNK1,KCNK2,KCNQ3,SCN8A
yellow	GOTERM_MF_FAT	GO:0022832~voltage-gated channel activity	TRUE	17	2.93663459894554e-05	0.0424445	0.656089	0.656069	CACNA1C,CACNG3,GRIN2D,KCNA1,KCNA4,KCNAB1,KCNAB2,KCND2,KCND3,KCNIP2,KCNJ11,KCNJ2,KCNJ4,KCNK1,KCNK2,KCNQ3,SCN8A
blue	GOTERM_BP_FAT	GO:0007186~G-protein coupled receptor protein signaling pathway	TRUE	39	0.000253654	0.445069	0.655816	0.65565	ADCY2,ADRA2A,AGK,CALCR,CARTPT,CCRL2,CHRM3,CHRM5,CXCL12,DGKQ,ENTPD1,F2RL2,FLNA,GABBR2,GAP43,GLRA1,GNG10,GNG2,GNG4,GPR123,GPR153,GPR162,HOMER2,HRH1,MRGPRX2,NMB,NPY2R,NPY5R,OPRD1,OPRL1,OPRM1,RAMP1,RGS7BP,S1PR1,SLC12A2,SORCS3,SST,TAC1,TGM2
blue	GOTERM_BP_FAT	GO:0007411~axon guidance	FALSE	18	6.52700843564908e-05	0.114704	0.655607	0.655564	APBB2,BMP7,CXCL12,EFNA5,ETV4,GAP43,ISL1,KAL1,KLF7,NRP2,NRXN1,NRXN3,NTF3,SEMA3A,SEMA5A,SHH,SLIT1,SLIT2
yellow	GOTERM_CC_FAT	GO:0005887~integral to plasma membrane	FALSE	37	0.00215208	2.83359	0.656892	0.655479	ACVR2A,ADAM23,ANKH,ATP1B3,ATP2A2,ATP2B1,CD2,CNR1,CNTN2,DRD2,DRD5,EPHA10,EPHA5,FLRT3,GRIN1,GRIN2D,GRM5,HOMER1,KCNA1,KCNA4,KCND2,KCND3,KCNIP2,KCNJ11,KCNJ2,KCNJ4,KCNK1,KCNK2,KCNQ3,LRMP,NTRK3,PCDH7,PRRG1,PTPRF,SCN8A,SDCBP,SLC18A2
blue	SP_PIR_KEYWORDS	differentiation	FALSE	32	0.00111735	1.59882	0.656165	0.655432	ARHGAP22,BMP7,CAMK1,CBFA2T3,CHL1,CTBP2,DAPL1,DCLK1,EDA,EFNA5,EFNB2,GAP43,HES5,LHX6,MAK,MGP,MYOG,NOTCH1,NRP2,PDLIM7,RBM45,RUFY3,SEMA3A,SEMA4B,SEMA5A,SEMA6D,SERPINE2,SLIT1,SLIT2,STMN1,TNFSF11,WNT5A
yellow	GOTERM_CC_FAT	GO:0031226~intrinsic to plasma membrane	FALSE	38	0.00197849	2.60782	0.655185	0.653889	ACVR2A,ADAM23,ANKH,ATP1B3,ATP2A2,ATP2B1,CD2,CNR1,CNTN2,DRD2,DRD5,EPHA10,EPHA5,FLRT3,GRIN1,GRIN2D,GRM5,HOMER1,KCNA1,KCNA4,KCND2,KCND3,KCNIP2,KCNJ11,KCNJ2,KCNJ4,KCNK1,KCNK2,KCNQ3,LRMP,NTNG2,NTRK3,PCDH7,PRRG1,PTPRF,SCN8A,SDCBP,SLC18A2
yellow	SP_PIR_KEYWORDS	potassium transport	FALSE	15	1.38303621060203e-06	0.00188992	0.652972	0.652971	ATP1B3,KCNA1,KCNA4,KCNAB1,KCNAB2,KCND2,KCND3,KCNIP2,KCNJ11,KCNJ2,KCNJ4,KCNK1,KCNK2,KCNQ3,SLC24A4
yellow	GOTERM_MF_FAT	GO:0030955~potassium ion binding	FALSE	15	3.65366356279267e-06	0.00528172	0.652972	0.652969	ATP1B3,KCNA1,KCNA4,KCNAB1,KCNAB2,KCND2,KCND3,KCNIP2,KCNJ11,KCNJ2,KCNJ4,KCNK1,KCNK2,KCNQ3,SLC24A4
yellow	SP_PIR_KEYWORDS	potassium	FALSE	15	3.81839064517025e-06	0.00521776	0.652972	0.652969	ATP1B3,KCNA1,KCNA4,KCNAB1,KCNAB2,KCND2,KCND3,KCNIP2,KCNJ11,KCNJ2,KCNJ4,KCNK1,KCNK2,KCNQ3,SLC24A4
yellow	GOTERM_BP_FAT	GO:0006813~potassium ion transport	FALSE	15	5.64452151774871e-05	0.0963206	0.652972	0.652935	ATP1B3,KCNA1,KCNA4,KCNAB1,KCNAB2,KCND2,KCND3,KCNIP2,KCNJ11,KCNJ2,KCNJ4,KCNK1,KCNK2,KCNQ3,SLC24A4
salmon	KEGG_PATHWAY	hsa04620:Toll-like receptor signaling pathway	TRUE	4	0.0114434	11.198	0.659933	0.652382	CASP8,MAPK14,PIK3R1,RAC1
greenyellow	SP_PIR_KEYWORDS	membrane	FALSE	59	0.00313905	3.97686	0.652986	0.650937	ADCY8,ADORA2B,AGPAT9,AIF1,AIF1L,ARL1,ATP1A1,ATP2B4,BCAP31,CA4,CAPNS1,CDH19,CERK,CHSY3,CNTN6,COLEC12,COX18,DOCK1,EHD4,FA2H,FXYD2,GDPD2,GDPD4,GLRA4,GPR61,GPRC5B,GRIK1,HEPACAM,HSD17B7,ITGB5,LEMD2,LGR5,LPAR1,MAG,MBP,NAPEPLD,NINJ2,P2RY12,PLP1,PROCR,PTPLB,RAB10,RAB11B,RAB39,RDH11,RHOU,SEC24A,SERP1,SLC6A9,SLC9A3R2,SSR4,STX2,TMEM222,TMEM25,TMEM63A,TMEM88,TSPAN10,TTYH2,UGT8
blue	GOTERM_BP_FAT	GO:0007409~axonogenesis	FALSE	25	0.000346226	0.607033	0.65057	0.650345	APBB2,BMP7,CXCL12,DCLK1,EFNA5,ETV4,GAP43,ISL1,KAL1,KLF7,MAP1B,NOTCH1,NRP2,NRXN1,NRXN3,NTF3,RTN4RL1,S100B,SEMA3A,SEMA5A,SHH,SLIT1,SLIT2,SLITRK4,UCHL1
blue	GOTERM_BP_FAT	GO:0048667~cell morphogenesis involved in neuron differentiation	FALSE	25	0.000780444	1.36343	0.65057	0.650063	APBB2,BMP7,CXCL12,DCLK1,EFNA5,ETV4,GAP43,ISL1,KAL1,KLF7,MAP1B,NOTCH1,NRP2,NRXN1,NRXN3,NTF3,RTN4RL1,S100B,SEMA3A,SEMA5A,SHH,SLIT1,SLIT2,SLITRK4,UCHL1
blue	GOTERM_BP_FAT	GO:0048812~neuron projection morphogenesis	FALSE	25	0.00139068	2.41727	0.65057	0.649666	APBB2,BMP7,CXCL12,DCLK1,EFNA5,ETV4,GAP43,ISL1,KAL1,KLF7,MAP1B,NOTCH1,NRP2,NRXN1,NRXN3,NTF3,RTN4RL1,S100B,SEMA3A,SEMA5A,SHH,SLIT1,SLIT2,SLITRK4,UCHL1
blue	GOTERM_BP_FAT	GO:0048858~cell projection morphogenesis	FALSE	26	0.00455023	7.70594	0.652144	0.649176	APBB2,BMP7,CXCL12,DCLK1,EFNA5,ETV4,GAP43,ISL1,KAL1,KLF7,MAP1B,NOTCH1,NRP2,NRXN1,NRXN3,NTF3,RTN4RL1,S100B,SEMA3A,SEMA5A,SHH,SLIT1,SLIT2,SLITRK4,UCHL1,VANGL2
blue	GOTERM_BP_FAT	GO:0048514~blood vessel morphogenesis	FALSE	18	0.00578629	9.7004	0.652618	0.648842	ARHGAP22,CDH13,CXCL12,FGF18,GPX1,NOTCH1,NR2F2,NRP2,PDGFA,PLAT,S1PR1,SCG2,SEMA3C,SEMA5A,SHH,SLIT2,TGM2,ZMIZ1
yellow	GOTERM_MF_FAT	GO:0015662~ATPase activity, coupled to transmembrane movement of ions, phosphorylative mechanism	FALSE	8	0.000273686	0.394922	0.648739	0.648561	ATP11C,ATP1B3,ATP2A2,ATP2B1,ATP2B2,ATP2B3,ATP2C1,ATP5B
yellow	SP_PIR_KEYWORDS	serine/threonine-protein kinase	FALSE	20	0.00761745	9.9218	0.652876	0.647902	ACVR2A,BCR,CAMK1D,CAMK2B,CAMKK2,CIT,CSNK1G1,MAP2K3,MAP3K3,MAP3K5,MAP3K7,MAPK6,NLK,NUAK1,PAK7,PIK3R4,RPS6KA6,RPS6KB1,STK3,TAOK1
yellow	GOTERM_BP_FAT	GO:0015672~monovalent inorganic cation transport	FALSE	19	0.000793529	1.34612	0.648411	0.647897	ATP1B3,ATP5B,KCNA1,KCNA4,KCNAB1,KCNAB2,KCND2,KCND3,KCNIP2,KCNJ11,KCNJ2,KCNJ4,KCNK1,KCNK2,KCNQ3,SCN8A,SLC24A4,SLC38A9,SLC9A5
salmon	GOTERM_CC_FAT	GO:0048471~perinuclear region of cytoplasm	TRUE	7	0.00359758	4.26297	0.649553	0.647216	BCL10,KCNMA1,LNPEP,MAP7,SNAP25,SORBS2
blue	GOTERM_BP_FAT	GO:0032990~cell part morphogenesis	FALSE	26	0.00791057	13.0334	0.652144	0.646985	APBB2,BMP7,CXCL12,DCLK1,EFNA5,ETV4,GAP43,ISL1,KAL1,KLF7,MAP1B,NOTCH1,NRP2,NRXN1,NRXN3,NTF3,RTN4RL1,S100B,SEMA3A,SEMA5A,SHH,SLIT1,SLIT2,SLITRK4,UCHL1,VANGL2
blue	SP_PIR_KEYWORDS	receptor	FALSE	50	0.00946556	12.8126	0.652624	0.646447	ADRA2A,ANTXR2,CALCR,CCRL2,CHRM3,CHRM5,CSF1R,ESR1,F2RL2,FGFR1,GABBR2,GLRA1,GOSR2,GPR123,GPR153,GPR162,GRIA1,GRID2,GRIN2B,HRH1,IL1RAPL2,ITGA6,ITPR2,MRGPRX2,MS4A12,MS4A8B,NOTCH1,NPY2R,NPY5R,NR0B1,NR2F1,NR2F2,NRP2,OPRD1,OPRL1,OPRM1,PLXNA4,PLXNC1,PTPRG,PTPRK,PTPRN,PTPRR,RAMP1,RHBDF1,RTN4RL1,RYR3,S1PR1,SLC20A2,SORCS3,TNFSF11
yellow	GOTERM_MF_FAT	GO:0042625~ATPase activity, coupled to transmembrane movement of ions	TRUE	8	0.00479437	6.71172	0.648739	0.645628	ATP11C,ATP1B3,ATP2A2,ATP2B1,ATP2B2,ATP2B3,ATP2C1,ATP5B
blue	GOTERM_BP_FAT	GO:0050767~regulation of neurogenesis	FALSE	18	0.00736867	12.1944	0.649757	0.644969	ARHGDIA,BMP7,CCND2,EYA1,HES5,ISL1,LINGO1,MAP1B,NOTCH1,NTF3,RUFY3,SEMA3A,SHH,SLIT2,TIMP2,VWC2,YWHAG,YWHAH
yellow	INTERPRO	IPR000210:BTB/POZ-like	TRUE	15	0.000611776	0.927074	0.645202	0.644807	ABTB2,BTBD10,BTBD6,GZF1,IVNS1ABP,KCNA1,KCNA4,KCND2,KCND3,KLHL11,KLHL18,KLHL2,KLHL28,ZBTB17,ZBTB34
yellow	INTERPRO	IPR011333:BTB/POZ fold	TRUE	15	0.000721924	1.09314	0.645202	0.644736	ABTB2,BTBD10,BTBD6,GZF1,IVNS1ABP,KCNA1,KCNA4,KCND2,KCND3,KLHL11,KLHL18,KLHL2,KLHL28,ZBTB17,ZBTB34
yellow	GOTERM_CC_FAT	GO:0044459~plasma membrane part	FALSE	67	0.00101986	1.35222	0.645337	0.644679	ACVR2A,ADAM23,AJAP1,ANKH,ARHGAP32,ARPC2,ATP1B3,ATP2A2,ATP2B1,ATP2B2,BCAR1,BSN,CA9,CACNA1C,CACNG3,CD2,CNR1,CNTN2,DRD2,DRD5,DUSP15,EPHA10,EPHA5,FLRT3,GJB7,GNAI1,GPSM1,GRIN1,GRIN2D,GRM5,HOMER1,KCNA1,KCNA4,KCND2,KCND3,KCNIP2,KCNJ11,KCNJ2,KCNJ4,KCNK1,KCNK2,KCNQ3,LRMP,LRP8,NRG1,NTNG2,NTRK3,PANX2,PARD6A,PCDH7,PRRG1,PTPN1,PTPRF,RAP2C,RIMS2,RIMS3,RPS6KB1,SCN8A,SDCBP,SLC18A2,SNTA1,SPRY4,SPTBN1,SYT2,SYT6,VC…
yellow	KEGG_PATHWAY	hsa04010:MAPK signaling pathway	TRUE	16	0.00681923	7.47514	0.648772	0.644348	CACNA1C,CACNG3,CASP3,DUSP6,GRB2,MAP2K3,MAP3K3,MAP3K5,MAP3K7,NLK,NR4A1,PPP3CA,PPP3R1,RPS6KA6,STK3,TAOK1
yellow	SMART	SM00225:BTB	FALSE	15	0.00245782	2.98017	0.645202	0.643616	ABTB2,BTBD10,BTBD6,GZF1,IVNS1ABP,KCNA1,KCNA4,KCND2,KCND3,KLHL11,KLHL18,KLHL2,KLHL28,ZBTB17,ZBTB34
yellow	INTERPRO	IPR008271:Serine/threonine protein kinase, active site	FALSE	19	0.00750592	10.834	0.646441	0.641589	ACVR2A,CAMK1D,CAMK2B,CAMKK2,CIT,CSNK1G1,MAP2K3,MAP3K3,MAP3K5,MAP3K7,MAPK6,NLK,NUAK1,PAK7,PIK3R4,RPS6KA6,RPS6KB1,STK3,TAOK1
blue	GOTERM_BP_FAT	GO:0000904~cell morphogenesis involved in differentiation	FALSE	27	0.000846582	1.47816	0.639658	0.639116	APBB2,BMP7,CXCL12,DAB2,DCLK1,EFNA5,ETV4,GAP43,ISL1,KAL1,KLF7,LAMC1,MAP1B,NOTCH1,NRP2,NRXN1,NRXN3,NTF3,RTN4RL1,S100B,SEMA3A,SEMA5A,SHH,SLIT1,SLIT2,SLITRK4,UCHL1
blue	SP_PIR_KEYWORDS	synapse	FALSE	24	0.00105736	1.51358	0.639653	0.638976	ARC,CADPS2,CBLN4,CHRM3,CHRM5,CTBP2,GABBR2,GAD2,GAP43,GLRA1,GRIA1,GRID2,GRID2IP,GRIN2B,GRIP1,HOMER2,RAD21L1,SYN2,SYNGR1,SYT17,SYT4,SYT9,VAMP2,VAMP3
blue	GOTERM_BP_FAT	GO:0045664~regulation of neuron differentiation	FALSE	16	0.00624487	10.43	0.639118	0.635127	ARHGDIA,CCND2,EYA1,HES5,ISL1,LINGO1,MAP1B,NOTCH1,RUFY3,SEMA3A,SHH,SLIT2,TIMP2,VWC2,YWHAG,YWHAH
blue	SP_PIR_KEYWORDS	cell junction	FALSE	35	0.000410841	0.590661	0.635214	0.634953	ARC,ARHGAP21,CADPS2,CBLN4,CD99L2,CHRM3,CHRM5,CLDN12,CLDN19,CTBP2,GABBR2,GAD2,GAP43,GJA5,GJB6,GLRA1,GRIA1,GRID2,GRID2IP,GRIN2B,GRIP1,HOMER2,JAM2,OCLN,PANX1,PTPRK,RAD21L1,SYN2,SYNGR1,SYT17,SYT4,SYT9,TJP2,VAMP2,VAMP3
yellow	GOTERM_MF_FAT	GO:0004674~protein serine/threonine kinase activity	FALSE	21	0.010091	13.6377	0.641113	0.634644	ACVR2A,BCR,CAMK1D,CAMK2B,CAMKK2,CIT,CSNK1G1,GTF2H3,MAP2K3,MAP3K3,MAP3K5,MAP3K7,MAPK6,NLK,NUAK1,PAK7,PIK3R4,RPS6KA6,RPS6KB1,STK3,TAOK1
blue	UP_SEQ_FEATURE	domain:Laminin G-like	TRUE	6	0.000556772	0.950559	0.633601	0.633248	FAT1,NRXN1,NRXN2,NRXN3,SLIT1,SLIT2
blue	GOTERM_BP_FAT	GO:0001944~vasculature development	FALSE	23	0.000824772	1.44034	0.633705	0.633182	ARHGAP22,CDH13,CXCL12,DHCR7,EFNB2,FGF18,GJA5,GPX1,LAMA4,MMP2,NOTCH1,NR2F2,NRP2,PDGFA,PLAT,S1PR1,SCG2,SEMA3C,SEMA5A,SHH,SLIT2,TGM2,ZMIZ1
blue	GOTERM_BP_FAT	GO:0030182~neuron differentiation	FALSE	41	0.000325235	0.570328	0.633012	0.632806	APBB2,BMP7,CXCL12,DCLK1,EFNA5,ETV4,FARP2,FGFR1,GAP43,HES5,ISL1,KAL1,KLF7,LHX6,LHX8,LINGO1,MAP1B,NOTCH1,NRP2,NRXN1,NRXN3,NTF3,PHGDH,PTPRR,RTN1,RTN4RL1,S100B,S1PR1,SCLT1,SEMA3A,SEMA5A,SHH,SLIT1,SLIT2,SLITRK4,STMN2,STMN3,TRAPPC4,TUBB2A,TUBB2B,UCHL1
blue	SP_PIR_KEYWORDS	lipoprotein	FALSE	45	0.000162994	0.234724	0.631357	0.631254	ADRA2A,AKAP2,ART1,CD151,CDH13,CHIC1,COMT,CYB5R3,EFNA5,ENTPD1,GAD2,GAP43,GNG10,GNG2,GNG4,GRIA1,HRH1,KRAS,LSAMP,MAP6,MMP17,NAP1L1,NEGR1,NPY2R,NPY5R,NR2F2,OPRD1,OPRL1,OPRM1,PALM2,PEBP1,PHKA1,RAB26,RAB3B,RAB3C,RAP2A,RFTN1,RGS17,RGS7BP,RHOV,RTN4RL1,S1PR1,SHH,TIAM2,VSNL1,WNT5A
greenyellow	BIOCARTA	h_arenrf2Pathway:Oxidative Stress Induced Gene Expression Via Nrf2	TRUE	3	0.0146045	11.1321	0.639894	0.630549	FXYD2,GSTA2,HMOX1
greenyellow	UP_SEQ_FEATURE	topological domain:Cytoplasmic	FALSE	32	0.00501836	6.82313	0.633653	0.630473	ADCY8,ADORA2B,ATP1A1,ATP2B4,BCAP31,CDH19,CHSY3,COLEC12,GDPD2,GDPD4,GLRA4,GPR61,GPRC5B,GRIK1,HEPACAM,HSD17B7,ITGB5,LGR5,LPAR1,MAG,NINJ2,P2RY12,PLP1,PROCR,RDH11,SERP1,SLC6A9,SSR4,STX2,TMEM222,TMEM25,TTYH2
greenyellow	BIOCARTA	h_g1Pathway:Cell Cycle: G1/S Check Point	FALSE	3	0.0164422	12.4529	0.640858	0.630321	CDKN1A,DHFR,NPAT
yellow	GOTERM_MF_FAT	GO:0042626~ATPase activity, coupled to transmembrane movement of substances	TRUE	9	0.00746281	10.2632	0.634909	0.630171	ABCB7,ATP11C,ATP1B3,ATP2A2,ATP2B1,ATP2B2,ATP2B3,ATP2C1,ATP5B
yellow	GOTERM_CC_FAT	GO:0005886~plasma membrane	FALSE	97	0.000113367	0.151154	0.630173	0.630102	ACVR2A,ADAM23,AJAP1,ANKH,ARHGAP32,ARPC2,ATP1B3,ATP2A2,ATP2B1,ATP2B2,ATP2B3,ATP5B,BAIAP2,BCAR1,BSN,CA9,CACNA1C,CACNG3,CAP1,CASP3,CD2,CNKSR2,CNR1,CNTN2,CNTN3,CNTN4,CRIM1,DDX3X,DGKB,DGKZ,DRD2,DRD5,DTNBP1,DUSP15,EPHA10,EPHA5,FLRT3,FRMD5,GJB7,GLDN,GNAI1,GNAL,GOLPH3,GPR146,GPR27,GPR85,GPSM1,GRIN1,GRIN2D,GRM5,HOMER1,ITM2A,KCNA1,KCNA4,KCND2,KCND3,KCNIP2,KCNJ11,KCNJ2,KCNJ4,KCNK1,KCNK2,KCNQ3,LRMP,LRP8,NBEA…
yellow	INTERPRO	IPR017441:Protein kinase, ATP binding site	FALSE	23	0.00468609	6.89937	0.632778	0.629813	ABL2,ACVR2A,CAMK1D,CAMK2B,CAMKK2,CIT,CSNK1G1,EPHA10,EPHA5,MAP2K3,MAP3K3,MAP3K5,MAP3K7,MAPK6,NLK,NTRK3,NUAK1,PAK7,PIK3R4,RPS6KA6,RPS6KB1,STK3,TAOK1
yellow	GOTERM_MF_FAT	GO:0043492~ATPase activity, coupled to movement of substances	TRUE	9	0.00813084	11.1324	0.634909	0.629747	ABCB7,ATP11C,ATP1B3,ATP2A2,ATP2B1,ATP2B2,ATP2B3,ATP2C1,ATP5B
yellow	GOTERM_MF_FAT	GO:0016820~hydrolase activity, acting on acid anhydrides, catalyzing transmembrane movement of substances	TRUE	9	0.00813084	11.1324	0.634909	0.629747	ABCB7,ATP11C,ATP1B3,ATP2A2,ATP2B1,ATP2B2,ATP2B3,ATP2C1,ATP5B
blue	GOTERM_CC_FAT	GO:0030054~cell junction	FALSE	46	0.000173254	0.240406	0.629589	0.629479	ABCB1,ARC,ARHGAP21,CADPS2,CALB2,CBLN4,CD99L2,CHRM3,CHRM5,CLDN12,CLDN19,CTBP2,EPB41L3,EVL,GABBR2,GAD2,GAP43,GJA5,GJB6,GLRA1,GRIA1,GRID2,GRID2IP,GRIN2B,GRIP1,HOMER2,ITGA6,JAM2,MLF2,MPDZ,NPY2R,OCLN,OPRM1,PANX1,PTPRK,RAD21L1,SCN5A,SYN2,SYNGR1,SYT17,SYT4,SYT9,TJP2,VAMP2,VAMP3,WTIP
blue	GOTERM_BP_FAT	GO:0001568~blood vessel development	FALSE	22	0.00138484	2.40724	0.629555	0.628683	ARHGAP22,CDH13,CXCL12,DHCR7,FGF18,GJA5,GPX1,LAMA4,MMP2,NOTCH1,NR2F2,NRP2,PDGFA,PLAT,S1PR1,SCG2,SEMA3C,SEMA5A,SHH,SLIT2,TGM2,ZMIZ1
yellow	GOTERM_MF_FAT	GO:0000287~magnesium ion binding	TRUE	23	0.0106357	14.3222	0.635252	0.628496	ABL2,ACVR2A,ATP11C,ATP2A2,ATP2B1,ATP2B2,ATP2B3,ATP2C1,B4GALT6,GRIN1,GRIN2D,MAP3K3,MAP3K5,MAP3K7,MSH2,MSH6,NLK,NUAK1,POLK,PTEN,RPS6KA6,SMPD3,STK3
yellow	GOTERM_MF_FAT	GO:0043167~ion binding	FALSE	123	0.000596542	0.858927	0.628854	0.628479	ABL2,ACVR2A,ADAM23,ADAMTS5,AEBP1,AGAP3,AGFG1,AMFR,ANO3,ATP11C,ATP1B3,ATP2A2,ATP2B1,ATP2B2,ATP2B3,ATP2C1,ATP5B,B4GALT6,BAZ1B,BHMT2,BSN,CA7,CA9,CACNA1C,CACNG3,CALN1,CAMK1D,CAMKK2,CHN1,CIT,DGKB,DGKZ,DLK1,EGR1,EGR2,FDX1,GALNT1,GALNT13,GMEB2,GRIN1,GRIN2D,GTF2H3,GZF1,HIVEP2,JMJD1C,KCNA1,KCNA4,KCNAB1,KCNAB2,KCND2,KCND3,KCNIP2,KCNJ11,KCNJ2,KCNJ4,KCNK1,KCNK2,KCNQ3,KDM5B,KLF9,LOXL1,LRP8,MAN1A2,MAN1C1,MAP3K…
yellow	GOTERM_MF_FAT	GO:0046872~metal ion binding	FALSE	122	0.000337235	0.486412	0.628271	0.628059	ABL2,ACVR2A,ADAM23,ADAMTS5,AEBP1,AGAP3,AGFG1,AMFR,ANO3,ATP11C,ATP1B3,ATP2A2,ATP2B1,ATP2B2,ATP2B3,ATP2C1,ATP5B,B4GALT6,BAZ1B,BHMT2,BSN,CA7,CA9,CACNA1C,CACNG3,CALN1,CAMK1D,CAMKK2,CHN1,CIT,DGKB,DGKZ,DLK1,EGR1,EGR2,FDX1,GALNT1,GALNT13,GMEB2,GRIN1,GRIN2D,GTF2H3,GZF1,HIVEP2,JMJD1C,KCNA1,KCNA4,KCNAB1,KCNAB2,KCND2,KCND3,KCNIP2,KCNJ11,KCNJ2,KCNJ4,KCNK1,KCNK2,KCNQ3,KDM5B,KLF9,LOXL1,LRP8,MAN1A2,MAN1C1,MAP3K…
yellow	INTERPRO	IPR000719:Protein kinase, core	FALSE	23	0.00754591	10.8886	0.632778	0.628003	ABL2,ACVR2A,CAMK1D,CAMK2B,CAMKK2,CIT,CSNK1G1,EPHA10,EPHA5,MAP2K3,MAP3K3,MAP3K5,MAP3K7,MAPK6,NLK,NTRK3,NUAK1,PAK7,PIK3R4,RPS6KA6,RPS6KB1,STK3,TAOK1
yellow	GOTERM_MF_FAT	GO:0043169~cation binding	FALSE	122	0.000518672	0.747198	0.628271	0.627945	ABL2,ACVR2A,ADAM23,ADAMTS5,AEBP1,AGAP3,AGFG1,AMFR,ANO3,ATP11C,ATP1B3,ATP2A2,ATP2B1,ATP2B2,ATP2B3,ATP2C1,ATP5B,B4GALT6,BAZ1B,BHMT2,BSN,CA7,CA9,CACNA1C,CACNG3,CALN1,CAMK1D,CAMKK2,CHN1,CIT,DGKB,DGKZ,DLK1,EGR1,EGR2,FDX1,GALNT1,GALNT13,GMEB2,GRIN1,GRIN2D,GTF2H3,GZF1,HIVEP2,JMJD1C,KCNA1,KCNA4,KCNAB1,KCNAB2,KCND2,KCND3,KCNIP2,KCNJ11,KCNJ2,KCNJ4,KCNK1,KCNK2,KCNQ3,KDM5B,KLF9,LOXL1,LRP8,MAN1A2,MAN1C1,MAP3K…
blue	GOTERM_BP_FAT	GO:0048666~neuron development	FALSE	34	0.000695517	1.21592	0.628376	0.627938	APBB2,BMP7,CXCL12,DCLK1,EFNA5,ETV4,FARP2,FGFR1,GAP43,ISL1,KAL1,KLF7,LHX6,LHX8,LINGO1,MAP1B,NOTCH1,NRP2,NRXN1,NRXN3,NTF3,PHGDH,RTN4RL1,S100B,SCLT1,SEMA3A,SEMA5A,SHH,SLIT1,SLIT2,SLITRK4,STMN3,TRAPPC4,UCHL1
yellow	SP_PIR_KEYWORDS	kinase	FALSE	33	0.00365407	4.87942	0.629505	0.627205	ABL2,ACVR2A,BAZ1B,BCR,CAMK1D,CAMK2B,CAMKK2,CIT,CKS2,CNKSR2,CSNK1G1,DGKB,DGKZ,EPHA10,EPHA5,GK5,MAP2K3,MAP3K3,MAP3K5,MAP3K7,MAPK6,NELL2,NLK,NTRK3,NUAK1,PACSIN2,PAK7,PGK2,PIK3R4,RPS6KA6,RPS6KB1,STK3,TAOK1
yellow	GOTERM_MF_FAT	GO:0004672~protein kinase activity	FALSE	27	0.0097644	13.2249	0.632325	0.626151	ABL2,ACVR2A,BAZ1B,BCR,CAMK1D,CAMK2B,CAMKK2,CIT,CRIM1,CSNK1G1,EPHA10,EPHA5,GTF2H3,MAP2K3,MAP3K3,MAP3K5,MAP3K7,MAPK6,NLK,NTRK3,NUAK1,PAK7,PIK3R4,RPS6KA6,RPS6KB1,STK3,TAOK1
blue	UP_SEQ_FEATURE	topological domain:Extracellular	FALSE	108	3.67792325379872e-06	0.00630729	0.625597	0.625594	ABHD12,ADRA2A,ANO6,ANTXR2,AQP1,AQP4,ATP11A,ATP8A2,BAMBI,CACNA2D2,CALCR,CCRL2,CD151,CD99L2,CHL1,CHRM3,CHRM5,CLDN12,CLDN19,CLEC10A,CNTNAP4,COL25A1,CSF1R,CSMD3,EDA,EFNB2,ELFN1,ENTPD1,ERMP1,F2RL2,FAT1,FGFR1,FNDC4,FXYD6,GABBR2,GJA5,GJB6,GLRA1,GPR123,GPR153,GPR162,GRIA1,GRID2,GRIN2B,HRH1,IL1RAPL2,ILDR2,ITGA6,ITPR2,JAM2,KCNJ6,KCNT1,KIAA1644,LINGO1,LRRTM3,LRTM2,MCAM,MIA3,MRGPRX2,MYOF,NLGN3,NOTCH1,NPY2R,N…
yellow	INTERPRO	IPR013069:BTB/POZ	FALSE	10	0.00996416	14.1367	0.629953	0.623676	ABTB2,BTBD6,GZF1,IVNS1ABP,KLHL11,KLHL18,KLHL2,KLHL28,ZBTB17,ZBTB34
yellow	GOTERM_BP_FAT	GO:0030510~regulation of BMP signaling pathway	TRUE	5	0.00793097	12.7104	0.628497	0.623513	ACVR2A,SMURF1,SOSTDC1,TOB1,TWSG1
blue	GOTERM_BP_FAT	GO:0031175~neuron projection development	FALSE	30	0.000289997	0.508683	0.623621	0.623441	APBB2,BMP7,CXCL12,DCLK1,EFNA5,ETV4,FGFR1,GAP43,ISL1,KAL1,KLF7,LINGO1,MAP1B,NOTCH1,NRP2,NRXN1,NRXN3,NTF3,PHGDH,RTN4RL1,S100B,SEMA3A,SEMA5A,SHH,SLIT1,SLIT2,SLITRK4,STMN3,TRAPPC4,UCHL1
blue	GOTERM_BP_FAT	GO:0007267~cell-cell signaling	FALSE	40	0.00191103	3.30748	0.624217	0.623024	ABAT,CARTPT,COMT,EFNA5,EFNB2,FADS1,FAT1,FGF18,GABBR2,GAD2,GCHFR,GJA5,GLRA1,GRIA1,GRID2,GRIN2B,HRH1,IL7,ILDR2,KCNK3,NLGN3,NMB,NPY5R,NRXN1,NRXN3,NTF3,PANX1,PDGFA,PEBP1,PLAT,RAD21L1,SALL1,SEMA5A,SHH,SIX3,SST,SYN2,SYT4,TAC1,WNT5A
blue	GOTERM_CC_FAT	GO:0005615~extracellular space	FALSE	34	0.0055554	7.44691	0.624973	0.621501	BMP7,BTD,CARTPT,CDH13,COL25A1,CRHBP,CXCL12,EFNA5,FGF18,FXYD6,IGFBP2,IL7,KAL1,MGP,MIF,MMP2,MMP9,PDGFA,PEBP1,PLAT,PON1,RAMP1,SCG2,SEMA3C,SERPINE2,SHH,SLIT1,SLIT2,SST,TAC1,TNFSF11,TTR,VWC2,WNT5A
yellow	KEGG_PATHWAY	hsa05014:Amyotrophic lateral sclerosis (ALS)	TRUE	9	0.000122681	0.139207	0.621133	0.621057	CASP3,GRIN1,GRIN2D,MAP2K3,MAP3K5,NEFL,NEFM,PPP3CA,PPP3R1
blue	GOTERM_BP_FAT	GO:0030030~cell projection organization	FALSE	36	0.000779801	1.36231	0.619954	0.619471	APBB2,BMP7,CDH13,CROCC,CXCL12,DCLK1,EFNA5,ETV4,FGFR1,GAP43,ISL1,ITGA6,KAL1,KLF7,LINGO1,MAP1B,NOTCH1,NRP2,NRXN1,NRXN3,NTF3,PDGFA,PHGDH,RTN4RL1,S100B,SEMA3A,SEMA5A,SHH,SLIT1,SLIT2,SLITRK4,STMN3,TRAPPC4,UBE2B,UCHL1,VANGL2
yellow	GOTERM_CC_FAT	GO:0031224~intrinsic to membrane	FALSE	117	0.0096873	12.1802	0.625024	0.618969	ABCB7,ABHD6,ACBD5,ACVR2A,ADAM23,AGFG1,AJAP1,AMFR,ANKH,ANO3,ATL2,ATP11C,ATP1B3,ATP2A2,ATP2B1,ATP2B2,ATP2B3,ATP2C1,B4GALT6,CA9,CACNA1C,CACNG3,CADM2,CALN1,CD2,CHST1,CMTM3,CNR1,CNTN2,CNTN3,CNTN4,CRIM1,DLK1,DRD2,DRD5,EPHA10,EPHA5,FAM171A1,FAM69B,FLRT3,FRMD5,GALNT1,GALNT13,GJB7,GLDN,GLT8D1,GPR146,GPR27,GPR85,GRAMD1B,GRIN1,GRIN2D,GRM5,GSG1L,HHATL,HOMER1,INPP5A,ITM2A,ITM2C,JPH4,KCNA1,KCNA4,KCNAB1,KCNAB2,…
yellow	GOTERM_BP_FAT	GO:0007167~enzyme linked receptor protein signaling pathway	FALSE	19	0.00365717	6.06342	0.621086	0.618815	ACVR2A,BAIAP2,BCAR1,EPHA10,EPHA5,GRB2,MAP3K7,NLK,NRG1,NTRK3,PTEN,PTPN1,PTPRF,SMURF1,SPTBN1,TGFBRAP1,TOB1,TWSG1,VEGFA
blue	SP_PIR_KEYWORDS	glycoprotein	FALSE	175	2.14937742104892e-06	0.00309862	0.617856	0.617855	ABCB1,ABCC5,ABHD12,ACER3,ADCY2,ADRA2A,ANO6,ANTXR2,AQP1,AQP4,ART1,ASAH1,BAMBI,BMP7,BTD,C1QTNF6,CACNA2D2,CALCR,CBLN4,CCRL2,CD151,CD99L2,CDH13,CHGB,CHL1,CHRM3,CHRM5,CLEC10A,CNTNAP4,COCH,COL25A1,COL5A2,CRHBP,CRTAC1,CSF1R,CSMD3,CTSD,CTSL2,DCN,DISP2,ECM2,EDA,EFEMP1,EFNA5,EFNB2,ELFN1,ENTPD1,ERMP1,ESR1,F2RL2,FAM20B,FAT1,FGF18,FGFR1,FNDC4,GABBR2,GLRA1,GPR123,GPR162,GRIA1,GRID2,GRIN2B,HGSNAT,HM13,HMGCR,HRH…
yellow	SP_PIR_KEYWORDS	alternative splicing	FALSE	211	0.00676082	8.85342	0.621808	0.617604	ABCB7,ABL2,ACBD5,ADAM23,AEBP1,AGAP3,AGFG1,AIFM1,ALMS1,AMFR,ANGPT2,ANKRD13D,ARHGAP32,ARPP19,ARPP21,ATL2,ATP11C,ATP2A2,ATP2B1,ATP2B2,ATP2B3,ATP2C1,ATXN1,BAG5,BAIAP2,BAZ1B,BCR,BTBD6,CACNA1C,CADM2,CAMK1D,CAMK2B,CAMKK2,CAMSAP1L1,CAND1,CAP1,CCDC132,CCDC88B,CDK5RAP3,CHN1,CIT,CMTM3,CNKSR2,CNOT6L,CNR1,CNTN4,COG3,COMMD4,CSDA,CSNK1G1,CTU2,DACH1,DACH2,DCTN1,DENND2A,DGKB,DGKZ,DLK1,DNAJB5,DNAL1,DRD2,DTNBP1,DUS…
blue	UP_SEQ_FEATURE	glycosylation site:N-linked (GlcNAc...)	FALSE	163	1.22548652046866e-05	0.0210145	0.616199	0.616191	ABCB1,ABCC5,ACER3,ADCY2,ADRA2A,ANO6,ANTXR2,AQP1,AQP4,ART1,ASAH1,BAMBI,BMP7,BTD,C1QTNF6,CACNA2D2,CALCR,CBLN4,CCRL2,CD151,CDH13,CHL1,CHRM3,CHRM5,CLEC10A,CNTNAP4,COCH,COL5A2,CRHBP,CSF1R,CSMD3,CTSD,CTSL2,DCN,DISP2,ECM2,EDA,EFEMP1,EFNA5,EFNB2,ELFN1,ENTPD1,ERMP1,F2RL2,FAM20B,FAT1,FGF18,FGFR1,FNDC4,GABBR2,GLRA1,GPR123,GPR162,GRIA1,GRID2,GRIN2B,HGSNAT,HM13,HMGCR,HRH1,HYOU1,IL1RAPL2,IL7,INHBB,ITGA6,JAM2,K…
yellow	UP_SEQ_FEATURE	splice variant	FALSE	211	0.00615055	9.56616	0.619433	0.615624	ABCB7,ABL2,ACBD5,ADAM23,AEBP1,AGAP3,AGFG1,AIFM1,ALMS1,ANGPT2,ANKRD13D,ARHGAP32,ARPP19,ARPP21,ATL2,ATP11C,ATP2A2,ATP2B1,ATP2B2,ATP2B3,ATP2C1,BAG5,BAIAP2,BAZ1B,BCR,BTBD6,CACNA1C,CADM2,CAMK1D,CAMK2B,CAMKK2,CAMSAP1L1,CAND1,CAP1,CCDC132,CCDC88B,CDK5RAP3,CHN1,CIT,CMTM3,CNKSR2,CNOT6L,CNR1,CNTN4,COG3,COMMD4,CSDA,CSNK1G1,CTU2,DACH1,DACH2,DCTN1,DENND2A,DGKB,DGKZ,DLK1,DNAJB5,DNAL1,DRD2,DTNBP1,DUSP15,DUSP6,E…
blue	SP_PIR_KEYWORDS	signal	FALSE	131	6.45842582493063e-05	0.0930679	0.615557	0.615517	ADPGK,ANTXR2,ART1,ASAH1,BAMBI,BMP7,BTD,C1QTNF3,C1QTNF6,CACNA2D2,CALCR,CARTPT,CBLN4,CD99L2,CDH13,CHGB,CHL1,CNTNAP4,COCH,COL5A2,CRHBP,CRTAC1,CSF1R,CTSD,CTSL2,CXCL12,DCN,DHRS7,DHRSX,ECM2,EFEMP1,EFNA5,EFNB2,ELFN1,F2RL2,FAM172A,FAM19A3,FAM20B,FAT1,FGF18,FGFR1,FNDC4,FXYD6,GABBR2,GLRA1,GRIA1,GRID2,GRIN2B,HYOU1,IGFBP2,IL1RAPL2,IL7,INHBB,ITGA6,JAM2,KAL1,KIAA1644,LAMA2,LAMA4,LAMB4,LAMC1,LINGO1,LRRTM3,LRTM2…
blue	UP_SEQ_FEATURE	signal peptide	FALSE	131	6.53787755109901e-05	0.112063	0.615557	0.615516	ADPGK,ANTXR2,ART1,ASAH1,BAMBI,BMP7,BTD,C1QTNF3,C1QTNF6,CACNA2D2,CALCR,CARTPT,CBLN4,CD99L2,CDH13,CHGB,CHL1,CNTNAP4,COCH,COL5A2,CRHBP,CRTAC1,CSF1R,CTSD,CTSL2,CXCL12,DCN,DHRS7,DHRSX,ECM2,EFEMP1,EFNA5,EFNB2,ELFN1,F2RL2,FAM172A,FAM19A3,FAM20B,FAT1,FGF18,FGFR1,FNDC4,FXYD6,GABBR2,GLRA1,GRIA1,GRID2,GRIN2B,HYOU1,IGFBP2,IL1RAPL2,IL7,INHBB,ITGA6,JAM2,KAL1,KIAA1644,LAMA2,LAMA4,LAMB4,LAMC1,LINGO1,LRRTM3,LRTM2…
blue	SP_PIR_KEYWORDS	cell membrane	FALSE	100	7.25945365963145e-07	0.00104656	0.613782	0.613781	ADRA2A,AKAP2,ANTXR2,AP2A2,AP2B1,AP2S1,ARC,ATP6V0A2,CALCR,CAPN2,CCRL2,CD99L2,CDH13,CHIC1,CHL1,CHRM3,CHRM5,CLDN12,CLDN19,COMT,CRK,CSMD3,DGKQ,EDA,EFNA5,EPN1,F2RL2,FAT1,GAB2,GABBR2,GAD2,GAP43,GJA5,GJB6,GLRA1,GNG10,GNG2,GNG4,GPR123,GPR153,GPR162,GRIA1,GRID2,GRID2IP,GRIN2B,GRIP1,HOMER2,HRH1,IQGAP1,ITGA6,JAM2,KCNT1,KRAS,LINGO1,LSAMP,MGAM,MMP17,MRGPRX2,MYO1C,MYOF,NDRG1,NECAP1,NEGR1,NOTCH1,NPY2R,NPY5R,OPR…
blue	UP_SEQ_FEATURE	topological domain:Cytoplasmic	FALSE	145	3.28195301067638e-06	0.00562826	0.613478	0.613476	ABCB1,ABHD12,ADCY2,ADRA2A,ANO6,ANTXR2,AQP1,AQP4,ATP11A,ATP6V0A2,ATP8A2,BAMBI,CACNA2D2,CALCR,CCRL2,CD151,CD99L2,CHL1,CHRM3,CHRM5,CISD1,CLDN12,CLDN19,CLEC10A,CNTNAP4,COL25A1,CPT1A,CSF1R,CSMD3,EDA,EFNB2,ELFN1,ENTPD1,ERMP1,F2RL2,FAAH,FADS1,FAT1,FGFR1,FNDC4,FXYD6,GABBR2,GJA5,GJB6,GLRA1,GOSR2,GPR123,GPR153,GPR162,GRIA1,GRID2,GRIN2B,HGSNAT,HM13,HRH1,IL1RAPL2,ILDR2,ITGA6,ITPR2,JAM2,KCNJ6,KCNK10,KCNK3,KCN…
blue	INTERPRO	IPR012680:Laminin G, subdomain 2	TRUE	9	0.00075895	1.20898	0.613459	0.612993	CNTNAP4,FAT1,LAMA2,LAMA4,NRXN1,NRXN2,NRXN3,SLIT1,SLIT2
blue	SMART	SM00282:LamG	TRUE	9	0.000771582	0.977744	0.613459	0.612985	CNTNAP4,FAT1,LAMA2,LAMA4,NRXN1,NRXN2,NRXN3,SLIT1,SLIT2
blue	GOTERM_CC_FAT	GO:0005886~plasma membrane	FALSE	191	7.0566874885487e-08	9.8027562900338e-05	0.612974	0.612974	ABCB1,ABCC5,ADCY2,ADRA2A,AKAP2,ANTXR2,AP2A2,AP2B1,AP2S1,AQP1,AQP4,ARC,ARHGAP21,ARHGDIA,ART1,ATP6V0A2,ATP6V1A,ATP6V1B2,ATP6V1C1,ATP6V1E1,ATP6V1H,CADPS2,CALB2,CALCR,CAPN2,CBLN4,CCRL2,CD151,CD99L2,CDH13,CHIC1,CHL1,CHRM3,CHRM5,CLDN12,CLDN19,CLEC10A,CLNS1A,COL25A1,COMT,CRK,CSF1R,CSMD3,CTBP2,CYB5R3,CYTH3,DCLK1,DGKQ,DPYSL3,EDA,EFNA5,EFNB2,ENTPD1,EPB41L3,EPN1,ESR1,EVL,F2RL2,FAT1,FGFR1,FLNA,FXYD6,GABBR2,G…
blue	INTERPRO	IPR001791:Laminin G	TRUE	9	0.000970677	1.5438	0.613459	0.612863	CNTNAP4,FAT1,LAMA2,LAMA4,NRXN1,NRXN2,NRXN3,SLIT1,SLIT2
blue	UP_SEQ_FEATURE	lipid moiety-binding region:S-palmitoyl cysteine	FALSE	21	4.29656345625562e-05	0.0736587	0.612823	0.612797	ADRA2A,AKAP2,CD151,ENTPD1,GAD2,GAP43,GRIA1,HRH1,KRAS,MAP6,NPY2R,NPY5R,OPRD1,OPRL1,OPRM1,PALM2,PEBP1,RFTN1,RGS7BP,RHOV,S1PR1,WNT5A
blue	UP_SEQ_FEATURE	disulfide bond	FALSE	92	0.00496558	8.18273	0.615304	0.612249	ADRA2A,ANTXR2,ART1,BMP7,CARTPT,CBLN4,CCRL2,CHGB,CHL1,CHRM3,CHRM5,CLEC10A,CNTNAP4,COCH,CRHBP,CRTAC1,CSF1R,CSMD3,CTSD,CTSL2,CXCL12,DCN,EFEMP1,EFNA5,EFNB2,ERMP1,F2RL2,FABP5,FAT1,FGFR1,FXC1,GLRA1,HRH1,IGFBP2,IL1RAPL2,IL7,ILDR2,INHBB,ITGA6,JAM2,LAMA2,LAMA4,LAMB4,LAMC1,LINGO1,LSAMP,MALT1,MCAM,MGAM,MGP,MMP17,MMP2,MMP9,MUC2,NEGR1,NLGN3,NOTCH1,NPY2R,NPY5R,NRP2,NRXN1,NRXN2,NRXN3,NTF3,ODZ2,OPRD1,OPRL1,OPRM1…
blue	GOTERM_CC_FAT	GO:0044459~plasma membrane part	FALSE	122	0.000399374	0.553362	0.61207	0.611826	ABCB1,ABCC5,ADRA2A,AKAP2,AP2A2,AP2B1,AP2S1,AQP1,AQP4,ARC,ARHGAP21,ARHGDIA,ART1,ATP6V1A,ATP6V1E1,CADPS2,CALB2,CALCR,CBLN4,CCRL2,CD151,CD99L2,CDH13,CHRM3,CHRM5,CLDN12,CLDN19,COL25A1,COMT,CSF1R,CTBP2,CYB5R3,DCLK1,EDA,EFNA5,EFNB2,ENTPD1,EPB41L3,ESR1,EVL,F2RL2,FAT1,FGFR1,GABBR2,GAD2,GAP43,GBAS,GJA5,GJB6,GLRA1,GNG10,GNG2,GNG4,GRIA1,GRID2,GRID2IP,GRIN2B,GRIP1,HOMER2,HRH1,IGFBP2,ITGA6,JAM2,KCNJ6,KCNK3,KC…
blue	GOTERM_CC_FAT	GO:0031226~intrinsic to plasma membrane	FALSE	62	0.00877902	11.5287	0.617172	0.611754	ABCC5,ADRA2A,AQP1,AQP4,ART1,ATP6V1A,CALCR,CCRL2,CD151,CHRM3,CHRM5,COL25A1,CSF1R,DCLK1,EDA,EFNA5,EFNB2,ENTPD1,F2RL2,FAT1,FGFR1,GABBR2,GBAS,GLRA1,GRIA1,GRID2,GRIN2B,HRH1,ITGA6,JAM2,KCNJ6,KCNK3,KCNRG,KCTD15,KCTD4,MMP17,NPY2R,NPY5R,NRXN1,NRXN3,OPRD1,OPRL1,OPRM1,PEBP1,PTPRG,PTPRK,PTPRN,RAB26,RAMP1,RTN4RL1,SCN3A,SCN5A,SDC2,SLC12A2,SLC20A2,SLC25A14,SLC6A11,SLC6A7,SYNGR1,SYT13,TNFSF11,VAMP2
blue	GOTERM_BP_FAT	GO:0050877~neurological system process	FALSE	52	0.0030962	5.30659	0.613646	0.611746	ABAT,ALDH7A1,CARTPT,CHRM5,CLDN19,COCH,COMT,CRHBP,CRYM,CRYZ,EFEMP1,EIF2B2,EYA1,FOXP2,GABBR2,GAD2,GCHFR,GJB6,GLRA1,GPX1,GRIA1,GRID2,GRIN2B,HMGCR,HRH1,KCNK3,KRAS,LHX8,MRGPRX2,NLGN3,NPY5R,NRXN1,NRXN3,NTF3,OPRL1,OPRM1,PDE6G,PEBP1,PLAT,PRKAR1B,RAD21L1,S100B,S1PR1,SIX3,SLC12A2,SLIT2,SST,SYN2,SYT4,TAC1,UCHL1,WFS1
blue	SP_PIR_KEYWORDS	disulfide bond	FALSE	96	0.00450388	6.30048	0.614485	0.611718	ADRA2A,ANTXR2,ART1,BMP7,CACNA2D2,CARTPT,CBLN4,CCRL2,CHGB,CHL1,CHRM3,CHRM5,CLEC10A,CNTNAP4,COCH,CRHBP,CRTAC1,CSF1R,CSMD3,CTSD,CTSL2,CXCL12,DCN,EFEMP1,EFNA5,EFNB2,ENTPD1,ERMP1,F2RL2,FABP5,FAT1,FGFR1,FXC1,GLRA1,HRH1,IGFBP2,IL1RAPL2,IL7,ILDR2,INHBB,ITGA6,JAM2,LAMA2,LAMA4,LAMB4,LAMC1,LINGO1,LSAMP,MALT1,MCAM,MGAM,MGP,MMP17,MMP2,MMP9,MPST,MUC2,NEGR1,NLGN3,NOTCH1,NPY2R,NPY5R,NRP2,NRXN1,NRXN2,NRXN3,NTF3,O…
blue	GOTERM_CC_FAT	GO:0031224~intrinsic to membrane	FALSE	229	0.000788848	1.09027	0.611445	0.610962	ABCB1,ABCC5,ABHD12,ACER3,ADCY2,ADRA2A,AGPAT4,ALG8,ANO6,ANTXR2,AQP1,AQP4,ARL6IP1,ART1,ATP11A,ATP6V0A2,ATP6V1A,ATP6V1B2,ATP8A2,BAMBI,CACNA2D2,CALCR,CCRL2,CD151,CD99L2,CDH13,CHL1,CHRM3,CHRM5,CISD1,CLDN12,CLDN19,CLEC10A,CNTNAP4,COL25A1,COMT,CPT1A,CSF1R,CSMD3,CTXN2,CYP51A1,DCLK1,DHCR7,DISP2,DPY19L4,EDA,EFNA5,EFNB2,ELFN1,ELOVL6,ENTPD1,ERMP1,F2RL2,FAAH,FADS1,FAM82A1,FAR2,FAT1,FGFR1,FNDC3A,FNDC4,FRMD3,FX…
yellow	UP_SEQ_FEATURE	glycosylation site:O-linked (GlcNAc)	TRUE	5	0.00232925	3.72934	0.612375	0.610948	AGFG1,BSN,NEFL,NEFM,SPTBN1
blue	SP_PIR_KEYWORDS	membrane	FALSE	291	3.08193400594087e-09	4.44308499991664e-06	0.610426	0.610426	ABCB1,ABCC5,ABHD12,ACER3,ADCY2,ADRA2A,AGK,AGPAT4,AKAP2,ALG8,ANO6,ANTXR2,AP2A2,AP2B1,AP2S1,AQP1,AQP4,ARC,ARHGAP21,ARL6IP1,ART1,ATP11A,ATP5S,ATP6V0A2,ATP6V1B2,ATP8A2,AVEN,BAMBI,CACNA2D2,CADPS2,CALCR,CAPN2,CBFA2T3,CCRL2,CD151,CD99L2,CDH13,CHIC1,CHL1,CHRM3,CHRM5,CISD1,CLDN12,CLDN19,CLEC10A,CNTNAP4,COL25A1,COMT,CPT1A,CRK,CSF1R,CSMD3,CTXN2,CYB5R3,CYP51A1,DAB2,DGKQ,DHCR7,DISP2,DOCK9,DPY19L4,EDA,EFHD2,EF…
blue	SP_PIR_KEYWORDS	palmitate	FALSE	24	1.5505716561249e-05	0.0223516	0.609641	0.609631	ADRA2A,AKAP2,CD151,CHIC1,ENTPD1,GAD2,GAP43,GRIA1,HRH1,KRAS,MAP6,NPY2R,NPY5R,OPRD1,OPRL1,OPRM1,PALM2,PEBP1,RFTN1,RGS17,RGS7BP,RHOV,S1PR1,SHH,WNT5A
blue	GOTERM_CC_FAT	GO:0016021~integral to membrane	FALSE	218	0.00173458	2.38283	0.609395	0.608338	ABCB1,ABCC5,ABHD12,ACER3,ADCY2,ADRA2A,AGPAT4,ALG8,ANO6,ANTXR2,AQP1,AQP4,ARL6IP1,ART1,ATP11A,ATP6V0A2,ATP6V1A,ATP6V1B2,ATP8A2,BAMBI,CACNA2D2,CALCR,CCRL2,CD151,CD99L2,CHL1,CHRM3,CHRM5,CISD1,CLDN12,CLDN19,CLEC10A,CNTNAP4,COL25A1,COMT,CPT1A,CSF1R,CSMD3,CTXN2,CYP51A1,DCLK1,DHCR7,DISP2,DPY19L4,EDA,EFNB2,ELFN1,ELOVL6,ENTPD1,ERMP1,F2RL2,FAAH,FADS1,FAM82A1,FAR2,FAT1,FGFR1,FNDC3A,FNDC4,FRMD3,FXYD6,GABBR2,G…
blue	UP_SEQ_FEATURE	transmembrane region	FALSE	206	7.13763209874215e-06	0.01224	0.607754	0.60775	ABCB1,ABCC5,ABHD12,ACER3,ADCY2,ADRA2A,AGPAT4,ALG8,ANO6,ANTXR2,AQP1,AQP4,ARL6IP1,ATP11A,ATP6V0A2,ATP8A2,BAMBI,CACNA2D2,CALCR,CCRL2,CD151,CD99L2,CHL1,CHRM3,CHRM5,CISD1,CLDN12,CLDN19,CLEC10A,CNTNAP4,COL25A1,COMT,CPT1A,CSF1R,CSMD3,CTXN2,CYP51A1,DHCR7,DISP2,DPY19L4,EDA,EFNB2,ELFN1,ELOVL6,ENTPD1,ERMP1,F2RL2,FAAH,FADS1,FAM82A1,FAR2,FAT1,FGFR1,FNDC3A,FNDC4,FRMD3,FXYD6,GABBR2,GJA5,GJB6,GLRA1,GNG10,GOSR2,G…
blue	SP_PIR_KEYWORDS	transmembrane	FALSE	206	9.3672380538149e-06	0.0135035	0.607754	0.607748	ABCB1,ABCC5,ABHD12,ACER3,ADCY2,ADRA2A,AGPAT4,ALG8,ANO6,ANTXR2,AQP1,AQP4,ARL6IP1,ATP11A,ATP6V0A2,ATP8A2,BAMBI,CACNA2D2,CALCR,CCRL2,CD151,CD99L2,CHL1,CHRM3,CHRM5,CISD1,CLDN12,CLDN19,CLEC10A,CNTNAP4,COL25A1,COMT,CPT1A,CSF1R,CSMD3,CTXN2,CYP51A1,DHCR7,DISP2,DPY19L4,EDA,EFNB2,ELFN1,ELOVL6,ENTPD1,ERMP1,F2RL2,FAAH,FADS1,FAM82A1,FAR2,FAT1,FGFR1,FNDC3A,FNDC4,FRMD3,FXYD6,GABBR2,GJA5,GJB6,GLRA1,GNG10,GOSR2,G…
blue	SP_PIR_KEYWORDS	extracellular matrix	FALSE	18	0.0104551	14.0599	0.613705	0.607289	CHL1,COCH,COL5A2,CRTAC1,DCN,ECM2,LAMA2,LAMA4,LAMB4,LAMC1,MAMDC2,MMP17,MMP2,MMP9,TIMP2,VWC2,WNT5A,WNT5B
yellow	SP_PIR_KEYWORDS	phosphoprotein	FALSE	242	0.000537112	0.73148	0.607351	0.607025	ABL2,ACBD5,ADAM23,AGAP3,AGFG1,AIFM1,AIP,AJAP1,ALMS1,AMFR,AMMECR1L,ANKRD13D,ANKS1A,ARHGAP32,ARPP19,ARPP21,ATF1,ATG2B,ATL2,ATP11C,ATP2A2,ATP2B1,ATP2B2,ATP2B3,ATP2C1,ATP5B,ATXN1,BAIAP2,BAZ1B,BCAR1,BCR,BSN,BTBD10,CA9,CABIN1,CACNA1C,CACNG3,CAMK1D,CAMK2B,CAMKK2,CAMSAP1L1,CAND1,CAP1,CASP3,CCDC132,CCDC88B,CCDC92,CCDC93,CCNT1,CDC40,CDK5RAP3,CENPC1,CIT,CNKSR2,COG3,COMMD4,CPLX2,CRIM1,CSDA,CSNK1G1,CSTF3,CTU2…
yellow	GOTERM_BP_FAT	GO:0007242~intracellular signaling cascade	FALSE	47	0.00727214	11.7154	0.610781	0.606339	AGAP3,AIFM1,ALMS1,BCR,CAMKK2,CHN1,CIT,CKS2,CNR1,DGKB,DGKZ,DRD2,DRD5,DUSP6,GNAI1,GNAL,GRB2,GRM5,HOMER1,ITGB1BP1,KLF9,MAP2K3,MAP3K3,MAP3K5,MAP3K7,MCF2,MCTP1,MLL3,MSH2,MSH6,NCOA6,NKIRAS1,NLK,PDZD8,PLCB1,RAP2C,RAPGEF5,RARA,RASGEF1A,RASL12,RASSF5,RBM38,RGS4,RPS6KA6,RPS6KB1,SDCBP,STK3
yellow	GOTERM_MF_FAT	GO:0004721~phosphoprotein phosphatase activity	TRUE	12	0.00912777	12.415	0.611162	0.605583	DUSP15,DUSP6,PPP1CC,PPP1R12A,PPP3CA,PPP3R1,PTEN,PTP4A3,PTPN1,PTPN12,PTPN9,PTPRF
blue	SP_PIR_KEYWORDS	Secreted	FALSE	62	0.0037949	5.33383	0.607809	0.605502	ADPGK,ANTXR2,BMP7,BTD,C1QTNF3,C1QTNF6,CARTPT,CBLN4,CHGB,CHL1,COCH,COL5A2,CRTAC1,CXCL12,DCN,ECM2,EDA,EFEMP1,FAM172A,FAM19A3,FAM20B,FGF18,IGFBP2,IL7,INHBB,LAMA2,LAMA4,LAMB4,LAMC1,MAMDC2,MGP,MIF,MMP17,MMP2,MMP9,MUC2,NMB,NTF3,NTS,PDDC1,PDGFA,PLA2G12A,PLAT,PON1,PTGDS,SCG2,SEMA3A,SEMA3C,SERPINE2,SHH,SLIT1,SLIT2,SST,TAC1,TIMP2,TMEFF2,TNFSF11,TTR,VSTM2A,VWC2,WNT5A,WNT5B
yellow	GOTERM_BP_FAT	GO:0006796~phosphate metabolic process	FALSE	41	0.00399191	6.60075	0.605496	0.603078	ABL2,ACVR2A,ATP5B,BAZ1B,BCR,CAMK1D,CAMK2B,CAMKK2,CCNT1,CIT,CSNK1G1,DUSP15,DUSP6,EPHA10,EPHA5,GK5,MAP2K3,MAP3K3,MAP3K5,MAP3K7,MAPK6,MSH2,NLK,NTRK3,NUAK1,PAK7,PGK2,PIK3R4,PPP1CC,PPP3CA,PTEN,PTP4A3,PTPN1,PTPN12,PTPN9,PTPRF,RPS6KA6,RPS6KB1,SPTBN1,STK3,TAOK1
yellow	GOTERM_BP_FAT	GO:0006793~phosphorus metabolic process	FALSE	41	0.00399191	6.60075	0.605496	0.603078	ABL2,ACVR2A,ATP5B,BAZ1B,BCR,CAMK1D,CAMK2B,CAMKK2,CCNT1,CIT,CSNK1G1,DUSP15,DUSP6,EPHA10,EPHA5,GK5,MAP2K3,MAP3K3,MAP3K5,MAP3K7,MAPK6,MSH2,NLK,NTRK3,NUAK1,PAK7,PGK2,PIK3R4,PPP1CC,PPP3CA,PTEN,PTP4A3,PTPN1,PTPN12,PTPN9,PTPRF,RPS6KA6,RPS6KB1,SPTBN1,STK3,TAOK1
yellow	INTERPRO	IPR013089:Kelch related	TRUE	8	0.0101914	14.4362	0.60899	0.602783	ABTB2,BTBD6,IVNS1ABP,KLHDC8B,KLHL11,KLHL18,KLHL2,KLHL28
blue	GOTERM_CC_FAT	GO:0044421~extracellular region part	FALSE	52	0.000563068	0.77935	0.602491	0.602152	BMP7,BTD,CARTPT,CDH13,CHL1,COCH,COL25A1,COL5A2,CRHBP,CRTAC1,CXCL12,DCN,ECM2,EFEMP1,EFNA5,ENTPD1,FGF18,FXYD6,GRIN2B,IGFBP2,IL7,KAL1,LAMA2,LAMA4,LAMB4,LAMC1,MAMDC2,MGP,MIF,MMP17,MMP2,MMP9,MUC2,PDGFA,PEBP1,PLAT,PON1,RAMP1,SCG2,SEMA3C,SERPINE2,SHH,SLIT1,SLIT2,SST,TAC1,TIMP2,TNFSF11,TTR,VWC2,WNT5A,WNT5B
blue	UP_SEQ_FEATURE	domain:Laminin G-like 4	TRUE	6	0.000322359	0.551396	0.602213	0.602018	CNTNAP4,LAMA2,LAMA4,NRXN1,NRXN2,NRXN3
blue	GOTERM_CC_FAT	GO:0031982~vesicle	FALSE	53	0.000586631	0.811841	0.602043	0.60169	AP2A2,AP2B1,AP2S1,ARC,ARHGAP21,ARHGDIG,ATP6V0A2,ATP6V1B2,ATP6V1C1,BMP7,CADPS2,CALCR,CHGB,CHIC1,CTSD,CXXC4,DAB2,FASN,FNDC3A,GAD2,GCHFR,GRIA1,GRIN2B,GRIP1,IGFBP2,LRRK2,MYOF,NAP1L1,NECAP1,NOTCH1,NTF3,NTS,P4HB,PDGFA,PEBP1,PHLDA1,PLAT,RAB3B,RAB3C,SEC22B,SEC24B,SEC24C,SHH,STX6,SYN2,SYNGR1,SYT13,SYT17,SYT4,SYT9,TRAPPC4,UQCC,VAMP2
blue	UP_SEQ_FEATURE	domain:Laminin G-like 3	TRUE	6	0.00201873	3.40618	0.602213	0.600997	CNTNAP4,LAMA2,LAMA4,NRXN1,NRXN2,NRXN3
blue	GOTERM_BP_FAT	GO:0007610~behavior	FALSE	37	0.000163394	0.28691	0.599917	0.599819	ABAT,APRT,CARTPT,CCRL2,COMT,CPT1A,CRHBP,CXCL12,FOXP2,GLRA1,GRIA1,GRIN2B,HIPK2,HMGCR,KAL1,KRAS,LHX8,MRGPRX2,NLGN3,NPHP4,NPY2R,NPY5R,NRP2,OPRD1,OPRM1,PDGFA,PEBP1,PLCL1,PRKAR1B,PTGDS,S100B,SCG2,SEMA3A,SLIT2,TAC1,UCHL1,WFS1
yellow	UP_SEQ_FEATURE	domain:BTB	FALSE	11	0.00714098	11.0238	0.603257	0.59895	ABTB2,BTBD10,BTBD6,GZF1,IVNS1ABP,KLHL11,KLHL18,KLHL2,KLHL28,ZBTB17,ZBTB34
blue	GOTERM_CC_FAT	GO:0031410~cytoplasmic vesicle	FALSE	52	0.000362779	0.502776	0.59835	0.598133	AP2A2,AP2B1,AP2S1,ARC,ARHGAP21,ARHGDIG,ATP6V0A2,ATP6V1B2,ATP6V1C1,CADPS2,CALCR,CHGB,CHIC1,CTSD,CXXC4,DAB2,FASN,FNDC3A,GAD2,GCHFR,GRIA1,GRIN2B,GRIP1,IGFBP2,LRRK2,MYOF,NAP1L1,NECAP1,NOTCH1,NTF3,NTS,P4HB,PDGFA,PEBP1,PHLDA1,PLAT,RAB3B,RAB3C,SEC22B,SEC24B,SEC24C,SHH,STX6,SYN2,SYNGR1,SYT13,SYT17,SYT4,SYT9,TRAPPC4,UQCC,VAMP2
blue	GOTERM_CC_FAT	GO:0031988~membrane-bounded vesicle	FALSE	48	0.000269261	0.373393	0.59754	0.597379	AP2A2,AP2B1,AP2S1,ARC,ARHGDIG,ATP6V0A2,ATP6V1B2,BMP7,CALCR,CHGB,CHIC1,CTSD,CXXC4,DAB2,FASN,FNDC3A,GAD2,GCHFR,GRIA1,GRIN2B,GRIP1,LRRK2,NAP1L1,NECAP1,NOTCH1,NTF3,NTS,P4HB,PDGFA,PEBP1,PHLDA1,PLAT,RAB3B,RAB3C,SEC22B,SEC24B,SEC24C,SHH,STX6,SYN2,SYNGR1,SYT13,SYT17,SYT4,SYT9,TRAPPC4,UQCC,VAMP2
blue	GOTERM_CC_FAT	GO:0005576~extracellular region	FALSE	77	0.00748282	9.90794	0.601021	0.596524	ADPGK,ANTXR2,BMP7,BTD,C1QTNF3,C1QTNF6,CARTPT,CBLN4,CDH13,CHGB,CHL1,COCH,COL25A1,COL5A2,CRHBP,CRTAC1,CTSD,CXCL12,DCN,ECM2,EDA,EFEMP1,EFNA5,ENTPD1,F2RL2,FAM172A,FAM19A3,FAM20B,FGF18,FLNA,FXYD6,GRIN2B,IGFBP2,IL7,INHBB,KAL1,LAMA2,LAMA4,LAMB4,LAMC1,MAMDC2,MGP,MIF,MMP17,MMP2,MMP9,MUC2,NMB,NTF3,NTS,P4HB,PDDC1,PDGFA,PEBP1,PLA2G12A,PLAT,PON1,PTGDS,RAMP1,SCG2,SEMA3A,SEMA3C,SERPINE2,SHH,SLIT1,SLIT2,SST,TAC1…
blue	GOTERM_CC_FAT	GO:0043005~neuron projection	FALSE	33	0.00542338	7.27608	0.597062	0.593824	ADCY2,APBB2,AQP1,ARC,CALCR,CDH13,CHRM3,DPYSL3,ESR1,GABBR2,GAD2,GAP43,GCHFR,GRIN2B,IQGAP1,ITPR2,KIAA1598,KLHL24,LRRK2,MAP1B,MPDZ,NEGR1,NRP2,PEBP1,RUFY3,SEMA3A,STMN2,SYT4,TAC1,TIAM2,TRAPPC4,UCHL1,WFS1
blue	GOTERM_CC_FAT	GO:0016023~cytoplasmic membrane-bounded vesicle	FALSE	47	0.000241467	0.334911	0.593358	0.593214	AP2A2,AP2B1,AP2S1,ARC,ARHGDIG,ATP6V0A2,ATP6V1B2,CALCR,CHGB,CHIC1,CTSD,CXXC4,DAB2,FASN,FNDC3A,GAD2,GCHFR,GRIA1,GRIN2B,GRIP1,LRRK2,NAP1L1,NECAP1,NOTCH1,NTF3,NTS,P4HB,PDGFA,PEBP1,PHLDA1,PLAT,RAB3B,RAB3C,SEC22B,SEC24B,SEC24C,SHH,STX6,SYN2,SYNGR1,SYT13,SYT17,SYT4,SYT9,TRAPPC4,UQCC,VAMP2
blue	GOTERM_CC_FAT	GO:0031012~extracellular matrix	FALSE	25	0.00957389	12.5091	0.596948	0.591233	BMP7,CHL1,COCH,COL5A2,CRTAC1,DCN,ECM2,EFEMP1,ENTPD1,GRIN2B,KAL1,LAMA2,LAMA4,LAMB4,LAMC1,MAMDC2,MGP,MMP17,MMP2,MMP9,MUC2,TIMP2,VWC2,WNT5A,WNT5B
yellow	UP_SEQ_FEATURE	compositionally biased region:Poly-Pro	FALSE	22	0.00372806	5.9058	0.587903	0.585712	ABL2,ARHGAP32,ATP2B3,CAP1,CNKSR2,DGKZ,GRIN2D,JPH4,KCNJ4,LOXL1,NCOA6,NFX1,NR4A1,PALLD,PIK3R4,POU3F1,PRRG1,SF3A1,SLC24A4,TAF4,TOB1,WASF3
blue	GOTERM_CC_FAT	GO:0045202~synapse	FALSE	36	0.00096404	1.3309	0.583186	0.582623	APBB2,ARC,CADPS2,CBLN4,CHRM3,CHRM5,CTBP2,GABBR2,GAD2,GAP43,GLRA1,GRIA1,GRID2,GRID2IP,GRIN2B,GRIP1,HOMER2,LRRK2,MAP1B,MPDZ,NLGN3,NRXN1,PEBP1,PLAT,RAB3B,RAB3C,RAD21L1,SNAP91,SYN2,SYNGR1,SYT17,SYT4,SYT9,TRAPPC4,VAMP2,VAMP3
blue	GOTERM_BP_FAT	GO:0019226~transmission of nerve impulse	FALSE	28	0.00787658	12.981	0.586131	0.581514	ABAT,CARTPT,CHRM5,CLDN19,COMT,EIF2B2,GABBR2,GAD2,GCHFR,GLRA1,GRIA1,GRID2,GRIN2B,HRH1,KCNK3,NLGN3,NPY5R,NRXN1,NRXN3,NTF3,PEBP1,PLAT,RAD21L1,S1PR1,SST,SYN2,SYT4,TAC1
blue	GOTERM_CC_FAT	GO:0030136~clathrin-coated vesicle	FALSE	18	0.000739156	1.02192	0.578459	0.578031	AP2A2,AP2S1,DAB2,GAD2,GRIN2B,LRRK2,NECAP1,PEBP1,RAB3B,RAB3C,STX6,SYN2,SYNGR1,SYT17,SYT4,SYT9,TRAPPC4,VAMP2
blue	GOTERM_CC_FAT	GO:0008021~synaptic vesicle	FALSE	12	0.00292246	3.98413	0.578274	0.576584	GAD2,GRIN2B,LRRK2,PEBP1,RAB3B,RAB3C,SYN2,SYNGR1,SYT17,SYT4,SYT9,TRAPPC4
blue	GOTERM_CC_FAT	GO:0044456~synapse part	FALSE	26	0.00321689	4.37724	0.572004	0.570164	ARC,CHRM3,CHRM5,GABBR2,GAD2,GLRA1,GRIA1,GRID2,GRID2IP,GRIN2B,GRIP1,HOMER2,LRRK2,MAP1B,MPDZ,NRXN1,PEBP1,RAB3B,RAB3C,SNAP91,SYN2,SYNGR1,SYT17,SYT4,SYT9,TRAPPC4
blue	UP_SEQ_FEATURE	domain:Ras-associating	TRUE	6	0.00873176	13.9639	0.569089	0.56412	DGKQ,GRB14,RADIL,RAPH1,RGL1,SNX17
blue	GOTERM_BP_FAT	GO:0022610~biological adhesion	FALSE	41	0.00477732	8.07545	0.566296	0.563591	CD151,CD99L2,CDH13,CHL1,CLDN12,CLDN19,CNTNAP4,CXCL12,ECM2,EDA,ENTPD1,FAT1,FNDC3A,FXC1,HES5,ITGA6,JAM2,KAL1,LAMA2,LAMA4,LAMB4,LAMC1,LSAMP,MCAM,MGP,NEGR1,NLGN3,NPHP4,NRP2,NRXN1,NRXN2,NRXN3,PCDH10,PCDH17,PCDH18,PLXNC1,PTPRK,RADIL,RAPH1,S1PR1,SEMA5A
blue	GOTERM_BP_FAT	GO:0007155~cell adhesion	FALSE	41	0.00477732	8.07545	0.566296	0.563591	CD151,CD99L2,CDH13,CHL1,CLDN12,CLDN19,CNTNAP4,CXCL12,ECM2,EDA,ENTPD1,FAT1,FNDC3A,FXC1,HES5,ITGA6,JAM2,KAL1,LAMA2,LAMA4,LAMB4,LAMC1,LSAMP,MCAM,MGP,NEGR1,NLGN3,NPHP4,NRP2,NRXN1,NRXN2,NRXN3,PCDH10,PCDH17,PCDH18,PLXNC1,PTPRK,RADIL,RAPH1,S1PR1,SEMA5A
blue	UP_SEQ_FEATURE	domain:Laminin G-like 5	TRUE	5	0.000328758	0.562311	0.558719	0.558535	LAMA2,LAMA4,NRXN1,NRXN2,NRXN3
blue	GOTERM_CC_FAT	GO:0030135~coated vesicle	FALSE	20	0.00126486	1.74283	0.558133	0.557427	AP2A2,AP2S1,DAB2,GAD2,GRIN2B,LRRK2,NECAP1,PEBP1,RAB3B,RAB3C,SEC24B,SEC24C,STX6,SYN2,SYNGR1,SYT17,SYT4,SYT9,TRAPPC4,VAMP2
blue	GOTERM_BP_FAT	GO:0008202~steroid metabolic process	TRUE	16	0.00624487	10.43	0.541573	0.538191	C1QTNF3,CNBP,COMT,CYB5R3,CYP51A1,DHCR7,HMGCR,IDI1,INSIG2,LSS,NR0B1,NSDHL,SHH,SNX17,SQLE,YWHAH
yellow	INTERPRO	IPR002219:Protein kinase C, phorbol ester/diacylglycerol binding	TRUE	6	0.00698961	10.1254	0.536676	0.532925	CHN1,CIT,DGKB,DGKZ,PDZD8,RASSF5
yellow	INTERPRO	IPR002219:Protein kinase C-like, phorbol ester/diacylglycerol binding	TRUE	7	0.00732474	10.5859	0.533307	0.529401	CHN1,CIT,DGKB,DGKZ,MLL3,PDZD8,RASSF5
blue	GOTERM_CC_FAT	GO:0005789~endoplasmic reticulum membrane	TRUE	25	0.00605047	8.08492	0.524538	0.521364	ACER3,ALG8,ARL6IP1,CYB5R3,CYP51A1,DHCR7,EDA,ELOVL6,GOSR2,HMGCR,INSIG2,ITPR2,MIA3,NSDHL,PGAP1,PIGG,RRBP1,RTN1,RYR3,SEC24B,SEC24C,SEC61A2,SPTLC2,SQLE,WFS1
blue	GOTERM_CC_FAT	GO:0042175~nuclear envelope-endoplasmic reticulum network	TRUE	25	0.0108414	14.0518	0.524538	0.518851	ACER3,ALG8,ARL6IP1,CYB5R3,CYP51A1,DHCR7,EDA,ELOVL6,GOSR2,HMGCR,INSIG2,ITPR2,MIA3,NSDHL,PGAP1,PIGG,RRBP1,RTN1,RYR3,SEC24B,SEC24C,SEC61A2,SPTLC2,SQLE,WFS1
blue	KEGG_PATHWAY	hsa00030:Pentose phosphate pathway	TRUE	6	0.0116674	13.1324	0.522388	0.516293	PFKP,PGM2,PRPS1,PRPS2,RPE,TALDO1
blue	GOTERM_BP_FAT	GO:0050690~regulation of defense response to virus by virus	TRUE	4	0.00317593	5.43966	0.509623	0.508004	AP2A2,AP2B1,AP2S1,ATP6V1H
blue	KEGG_PATHWAY	hsa00280:Valine, leucine and isoleucine degradation	TRUE	9	0.00781599	8.98347	0.510598	0.506607	ABAT,ACAT2,ALDH6A1,ALDH7A1,BCAT1,ECHS1,HIBCH,MCCC2,PCCA
blue	GOTERM_BP_FAT	GO:0006694~steroid biosynthetic process	TRUE	11	0.0022773	3.9295	0.503852	0.502704	C1QTNF3,CNBP,CYB5R3,CYP51A1,DHCR7,HMGCR,IDI1,LSS,NR0B1,NSDHL,SQLE
blue	KEGG_PATHWAY	hsa05110:Vibrio cholerae infection	TRUE	10	0.00365901	4.30212	0.504529	0.502683	ATP6V0A2,ATP6V1A,ATP6V1B2,ATP6V1C1,ATP6V1E1,ATP6V1H,MUC2,SEC61A2,SLC12A2,TJP2
blue	SP_PIR_KEYWORDS	lipid synthesis	TRUE	13	0.00292918	4.14089	0.502564	0.501092	CYB5R3,CYP51A1,DHCR7,ELOVL6,FADS1,FAR2,FASN,HMGCR,IDI1,LASS4,LSS,NSDHL,PTGDS
blue	GOTERM_BP_FAT	GO:0016126~sterol biosynthetic process	TRUE	9	0.000400794	0.702389	0.492077	0.49188	CNBP,CYB5R3,CYP51A1,DHCR7,HMGCR,IDI1,LSS,NSDHL,SQLE
blue	GOTERM_BP_FAT	GO:0008203~cholesterol metabolic process	TRUE	11	0.00308693	5.29109	0.493234	0.491712	CNBP,CYB5R3,CYP51A1,DHCR7,HMGCR,IDI1,INSIG2,LSS,NSDHL,SNX17,SQLE
blue	GOTERM_BP_FAT	GO:0016125~sterol metabolic process	TRUE	11	0.00695088	11.5423	0.493234	0.489806	CNBP,CYB5R3,CYP51A1,DHCR7,HMGCR,IDI1,INSIG2,LSS,NSDHL,SNX17,SQLE
blue	KEGG_PATHWAY	hsa00640:Propanoate metabolism	TRUE	8	0.00274891	3.24821	0.488009	0.486668	ABAT,ACAT2,ALDH6A1,ALDH7A1,ECHS1,HIBCH,LDHA,PCCA
blue	SP_PIR_KEYWORDS	Steroid biosynthesis	TRUE	8	0.00333959	4.70815	0.481251	0.479643	ACAT2,CYB5R3,CYP51A1,DHCR7,HMGCR,IDI1,LSS,NSDHL
blue	GOTERM_BP_FAT	GO:0006695~cholesterol biosynthetic process	TRUE	8	0.000296185	0.519511	0.477367	0.477225	CNBP,CYB5R3,CYP51A1,DHCR7,HMGCR,IDI1,LSS,NSDHL
blue	SP_PIR_KEYWORDS	Cholesterol biosynthesis	TRUE	6	0.00390452	5.48388	0.417795	0.416164	CYB5R3,CYP51A1,DHCR7,HMGCR,IDI1,NSDHL
blue	SP_PIR_KEYWORDS	sterol biosynthesis	TRUE	6	0.0109567	14.6858	0.417795	0.413217	CYB5R3,CYP51A1,DHCR7,HMGCR,IDI1,NSDHL
